# Supplementary material
Source: ML conference proceedings conference paper supplement (https://openreview.net/forum?id=yfKOB5CO5dY)
Supplement: supplementary_material [file attachment]

# LOCALIZED META-LEARNING: A PAC-BAYES ANALYSIS FOR META-LEARNING BEYOND GLOBAL PRIOR

Anonymous authors

Paper under double-blind review

## ABSTRACT

Meta-learning methods learn the meta-knowledge among various training tasks and aim to promote the learning of new tasks under the task similarity assumption. Such meta-knowledge is often represented as a fixed distribution; this, however, may be too restrictive to capture various specific task information because the discriminative patterns in the data may change dramatically across tasks. In this work, we aim to equip the meta learner with the ability to model and produce task-specific meta knowledge and, accordingly, present a localized meta-learning framework based on the PAC-Bayes theory. In particular, we propose a Local Coordinate Coding (LCC) based prior predictor that allows the meta learner to generate local meta-knowledge for specific tasks adaptively. We further develop a practical algorithm with deep neural network based on the bound. Empirical results on real-world datasets demonstrate the efficacy of the proposed method.

## 1 INTRODUCTION

Recent years have seen a resurgence of interest in the field of meta-learning, or *learning-to-learn* (Thrun & Pratt, 2012), especially for empowering deep neural networks with the capability of fast adapting to unseen tasks just as humans (Finn et al., 2017; Ravi & Larochelle, 2017). More concretely, the neural networks are trained from a sequence of datasets, associated with different tasks sampled from a meta-distribution (also called task environment (Baxter, 2000; Maurer, 2005)). The principal aim of meta learner is to extract transferable meta-knowledge from observed tasks and facilitate the learning of new tasks sampled from the same meta-distribution. The performance is measured by the generalization ability from a finite set of observed tasks, which is evaluated by learning related unseen tasks. For this reason, there has been considerable interest in theoretical bounds on the generalization for meta-learning algorithms (Denevi et al., 2018b;a).

One typical line of work (Pentina & Lampert, 2014; Amit & Meir, 2018) uses PAC-Bayes bound to analyze the generalization behavior of the meta learner and quantify the relation between the expected loss on new tasks and the average loss on the observed tasks. In this setup, it formulates meta-learning as hierarchical Bayes. For each task, the base learner produces a *posterior* based on the associated task data and the *prior*. Each prior is a reference w.r.t. base model that is generated by the meta learner and must be chosen before observing task data. Accordingly, meta-knowledge is formulated as a global distribution over all possible priors. Initially, it is called as *hyperprior* since it is chosen before observing training tasks. To learn versatile meta-knowledge across tasks, the meta learner observes a sequence of training tasks and adjusts its hyperprior into a *hyperposterior* distribution over the set of priors. The prior generated by the hyperposterior is then used to solve new tasks.

Despite of its great success, such global hyperposterior is rather generic, typically not well tailored to various specific tasks. In contrast, in many scenarios the related tasks may require task-specific meta-knowledge. Consequently, traditional meta-knowledge may lead to sub-optimal performance for any individual prediction task. As a motivational example, suppose we have two different

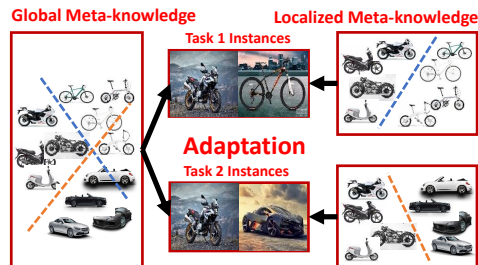

Figure 1: Illustration of the localized meta-learning framework. Instead of using global meta-knowledge for all tasks, we tailor the meta-knowledge for various specific task.

tasks: distinguishing motorcycle versus bicycle and distinguishing motorcycle versus car. Intuitively, each task uses distinct discriminative patterns and thus the desired meta-knowledge is required to extract these patterns simultaneously. It could be a challenging problem to represent it with a global hyperposterior since the most significant patterns in the first task could be irrelevant or even detrimental to the second task. Figure schematically illustrates this notion. Therefore, customized meta-knowledge such that the patterns are most discriminative for a given task is urgently desired. Can the meta-knowledge be adaptive to tasks? How can one achieve it? Intuitively, we could implement this idea by reformulating the meta-knowledge as a mapping function. Leveraging the samples in the target task, the meta model produces tasks specific meta-knowledge.

Naturally yet interestingly, one can see quantitatively how customized prior knowledge improves generalization capability, in light of the PAC-Bayes literature on the data distribution dependent-priors (Catoni, 2007; Parrado-Hernández et al., 2012; Dziugaite & Roy, 2018). Specifically, PAC-Bayes bounds control the generalization error of Gibbs Classifiers. They usually depend on a tradeoff between the empirical error of the posterior  $Q$  and a KL-divergence term  $KL(Q||P)$ , where  $P$  is the prior. Since this KL-divergence term forms part of the generalization bound and is typically large in standard PAC-Bayes approaches (Lever et al., 2013), the choice of posterior is constrained by the need to minimize the KL-divergence between prior  $P$  and posterior  $Q$ . Thus, choosing an appropriate prior for each task which is close to the related posterior could yield improved generalization bounds. This encourages the study of data distribution-dependent priors for the PAC-Bayes analysis and gives rise to principled approaches to localized PAC-Bayes analysis. Previous related work are mainly discussed in Appendix A.

Inspired by this, we propose a **Localized Meta-Learning (LML)** framework by formulating meta-knowledge as a conditional distribution over priors. Given task data distribution, we allow a meta learner to adaptively generate an appropriate prior for a new task. The challenges of developing this model are three-fold. First, the task data distribution is not explicitly given, and our only perception for it is via the associated sample set. Second, it should be permutation invariant — the output of model should not change under any permutation of the elements in the sample set. Third, the learned model could be used for solving unseen tasks. To address these problems, we further develop a prior predictor using Local Coordinate Coding (LCC)(Yu et al., 2009). In particular, if the classifier in each task is specialized to a parametric model, e.g. deep neural network, the proposed LCC-based prior predictor predicts base model parameters using the task sample set. The main contributions include: (1) A localized meta-learning framework which provides a means to tighten the original PAC-Bayes meta-learning bound (Pentina & Lampert, 2014; Amit & Meir, 2018) by minimizing the task-complexity term by choosing data-dependent prior; (2) An LCC-based prior predictor, an implementation of conditional hyperposterior, which generates local meta-knowledge for specific task; (3) A practical algorithm for probabilistic deep neural networks by minimizing the bound (though the optimization method can be applied to a large family of differentiable models); (4) Experimental results which demonstrate improved performance over meta-learning method in this field.

## 2 PRELIMINARIES

Our prior predictor was implemented by Local Coordinate Coding (LCC). The LML framework was inspired by PAC-Bayes theory for meta learning. In this section we briefly review the related definitions and formulations.

### 2.1 LOCAL COORDINATE CODING

**Definition 1. (Lipschitz Smoothness Yu et al. (2009).)** A function  $f(\mathbf{x})$  in  $\mathbb{R}^d$  is a  $(\alpha, \beta)$ -Lipschitz smooth w.r.t. a norm  $\|\cdot\|$  if  $\|f(\mathbf{x}) - f(\mathbf{x}')\| \leq \alpha \|\mathbf{x} - \mathbf{x}'\|$  and  $\|f(\mathbf{x}') - f(\mathbf{x}) - \nabla f(\mathbf{x})^\top (\mathbf{x}' - \mathbf{x})\| \leq \beta \|\mathbf{x} - \mathbf{x}'\|^2$ .

**Definition 2. (Coordinate Coding Yu et al. (2009).)** A coordinate coding is a pair  $(\gamma, C)$ , where  $C \subset \mathbb{R}^d$  is a set of anchor points(bases), and  $\gamma$  is a map of  $\mathbf{x} \in \mathbb{R}^d$  to  $[\gamma_{\mathbf{u}}(\mathbf{x})]_{\mathbf{u} \in C} \in \mathbb{R}^{|C|}$  such that  $\sum_{\mathbf{u}} \gamma_{\mathbf{u}}(\mathbf{x}) = 1$ . It induces the following physical approximation of  $\mathbf{x}$  in  $\mathbb{R}^d$ :  $\tilde{\mathbf{x}} = \sum_{\mathbf{u} \in C} \gamma_{\mathbf{u}}(\mathbf{x}) \mathbf{u}$ .

**Definition 3. (Latent Manifold Yu et al. (2009).)** A subset  $\mathcal{M} \subset \mathbb{R}^d$  is called a smooth manifold with an *intrinsic dimension*  $|C| := d_{\mathcal{M}}$  if there exists a constant  $c_{\mathcal{M}}$  such that given any  $\mathbf{x} \in \mathcal{M}$ ,

there exists  $|C|$  anchor points  $\mathbf{u}_1(\mathbf{x}), \dots, \mathbf{u}_{|C|}(\mathbf{x}) \in \mathbb{R}^d$  so that  $\forall \mathbf{x}' \in \mathcal{M}$ :

$$\inf_{\gamma \in \mathbb{R}^{|C|}} \|\mathbf{x}' - \mathbf{x} - \sum_{j=1}^{|C|} \gamma_j \mathbf{u}_j(\mathbf{x})\|_2 \leq c_{\mathcal{M}} \|\mathbf{x}' - \mathbf{x}\|_2^2,$$

95 where  $\gamma = [\gamma_1, \dots, \gamma_{|C|}]^\top$  are the local codings w.r.t. the anchor points.

96 Definition 2 and 3 imply that any point in  $\mathbb{R}^d$  can be expressed as a linear combination of a set  
 97 of anchor points. Later, we will show that a high dimensional nonlinear prior predictor can be  
 98 approximated by a simple linear function w.r.t. the coordinate coding, and the approximation quality  
 99 is ensured by the locality of such coding (each data point can be well approximated by a linear  
 100 combination of its nearby anchor points).

## 101 2.2 PAC-BAYES META-LEARNING

102 In order to present the advances proposed in this paper, we recall some definitions in PAC-Bayes  
 103 theory for single-task learning and meta-learning (Catoni, 2007; Baxter, 2000; Pentina & Lampert,  
 104 2014; Amit & Meir, 2018). In the context of classification, we assume all tasks share the same input  
 105 space  $\mathcal{X}$ , output space  $\mathcal{Y}$ , space of classifiers (hypotheses)  $\mathcal{H} \subset \{h : \mathcal{X} \rightarrow \mathcal{Y}\}$  and loss function  
 106  $\ell : \mathcal{Y} \times \mathcal{Y} \rightarrow [0, 1]$ . The meta learner observes  $n$  tasks in the form of sample sets  $S_1, \dots, S_n$ . The  
 107 number of samples in task  $i$  is denoted by  $m_i$ . Each observed task  $i$  consists of a set of *i.i.d.* samples  
 108  $S_i = \{(\mathbf{x}_j, y_j)\}_{j=1}^{m_i}$ , which is drawn from a data distribution  $S_i \sim D_i^{m_i}$ . Following the meta-learning  
 109 setup in (Baxter, 2000), we assume that each data distribution  $D_i$  is generated *i.i.d.* from the same  
 110 meta distribution  $\tau$ . Let  $h(\mathbf{x})$  be the prediction of  $\mathbf{x}$ , the goal of each task is to find a classifier  $h$   
 111 that minimizes the expected loss  $\mathbb{E}_{\mathbf{x} \sim D} \ell(h(\mathbf{x}), y)$ . Since the underlying ‘true’ data distribution  $D_i$  is  
 112 unknown, the base learner receives a finite set of samples  $S_i$  and produces an ‘optimal’ classifier  
 113  $h = A_b(S_i)$  with a learning algorithm  $A_b(\cdot)$  that will be used to predict the labels of unseen inputs.

114 PAC-Bayes theory studies the properties of randomized classifier, called Gibbs classifier. Let  $Q$  be a  
 115 posterior distribution over  $\mathcal{H}$ . To make a prediction, the Gibbs classifier samples a classifier  $h \in \mathcal{H}$   
 116 according to  $Q$  and then predicts a label with the chosen  $h$ . The expected error under data distribution  
 117  $D$  and empirical error on the sample set  $S$  are then given by averaging over distribution  $Q$ , namely  
 118  $er(Q) = \mathbb{E}_{h \sim Q} \mathbb{E}_{(x,y) \sim D} \ell(h(x), y)$  and  $\hat{er}(Q) = \mathbb{E}_{h \sim Q} \frac{1}{m} \sum_{j=1}^m \ell(h(x_j), y_j)$ , respectively.

In the context of meta-learning, the goal of the meta learner is to extract meta-knowledge contained in  
 the observed tasks that will be used as prior knowledge for learning new tasks. In each task, the prior  
 knowledge  $P$  is in the form of a distribution over classifiers  $\mathcal{H}$ . The base learner produces a posterior  
 $Q = A_b(S, P)$  over  $\mathcal{H}$  based on a sample set  $S$  and a prior  $P$ . All tasks are learned through the  
 same learning procedure. The meta learner treats the prior  $P$  itself as a random variable and assumes  
 the meta-knowledge is in the form of a distribution over all possible priors. Let hyperprior  $\mathcal{P}$  be an  
 initial distribution over priors, meta learner uses the observed tasks to adjust its original hyperprior  $\mathcal{P}$   
 into hyperposterior  $\mathcal{Q}$  from the learning process. Given this, the quality of the hyperposterior  $\mathcal{Q}$  is  
 measured by the expected task error of learning new tasks using priors generated from it, which is  
 formulated as:

$$er(\mathcal{Q}) = \mathbb{E}_{P \sim \mathcal{Q}} \mathbb{E}_{(D,m) \sim \tau, S \sim D^m} er(Q = A_b(S, P)). \quad (1)$$

Accordingly, the empirical counterpart of the above quantity is given by:

$$\hat{er}(\mathcal{Q}) = \mathbb{E}_{P \sim \mathcal{Q}} \frac{1}{n} \sum_{i=1}^n \hat{er}(Q = A_b(S_i, P)). \quad (2)$$

## 119 2.3 PAC-BAYES REGULAR META-LEARNING BOUND WITH GAUSSIAN RANDOMIZATION

120 Based on the above definitions, Pentina & Lampert (2014) and Amit & Meir (2018) present regular  
 121 meta-learning PAC-Bayes generalization bounds w.r.t. hyperposterior  $\mathcal{Q}$ . Notably, the proof technique  
 122 in Amit & Meir (2018) allows to incorporate different single task bounds. Consider the benefit of  
 123 Catoni’s bound (Catoni, 2007) (the minimization problem derived from the bound is a simple linear  
 124 combination of empirical risk plus a regularizer), here we instantiate a regular meta-learning bound  
 125 with Gaussian randomization based on that. To make fair comparison, we will adopt the same Catoni’s  
 126 bound to analysis the proposed LML framework later. Particularly, the classifier  $h$  is parameterized  
 127 as  $h_{\mathbf{w}}$  with  $\mathbf{w} \in \mathbb{R}^{d_{\mathbf{w}}}$ . The prior and posterior are a distribution over the set of all possible parameters  
 128  $\mathbf{w}$ . We choose both the prior  $P$  and posterior  $Q$  to be spherical Gaussians, i.e.  $P = \mathcal{N}(\mathbf{w}^P, \sigma_{\mathbf{w}}^2 I_{d_{\mathbf{w}}})$

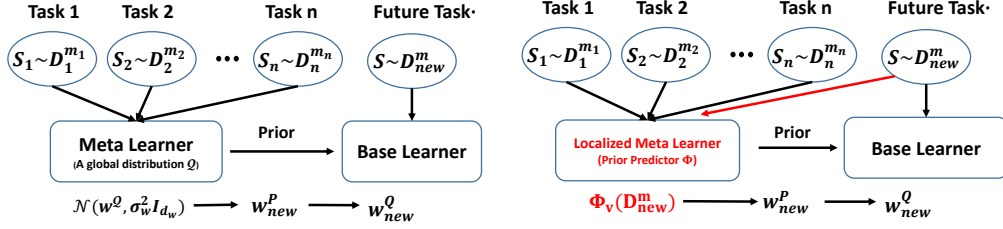

Figure 2: Comparison between PAC-Bayes regular meta-learning (left) and LML (right). In regular meta-learning, the mean of prior  $w^P$  is sampled from a global hyperposterior distribution  $\mathcal{Q} = \mathcal{N}(w^Q, \sigma_w^2 I_{d_w})$ . In LML,  $w^P$  is produced by a prior predictor  $\Phi_v(D_{new}^m)$ .

129 and  $Q = \mathcal{N}(w^Q, \sigma_w^2 I_{d_w})$ . The mean  $w^P$  is a random variable distributed first according to the  
 130 hyperprior  $\mathcal{P}$ , which we formulate as  $\mathcal{N}(0, \sigma_w^2 I_{d_w})$ , and later according to hyperposterior  $\mathcal{Q}$ , which  
 131 we model as  $\mathcal{N}(w^Q, \sigma_w^2 I_{d_w})$ . When encountering a new task  $i$ , we first sample the mean of prior  
 132  $w_i^P$  from the hyperposterior  $\mathcal{N}(w^Q, \sigma_w^2 I_{d_w})$ , and then use it as a basis to learn the mean of posterior  
 133  $w_i^Q = A_b(S_i, P)$ , as shown in Figure 2(left). Then, we could derive the following PAC-Bayes  
 134 meta-learning bound.

**Theorem 1.** Consider the regular meta-learning framework, given the hyperprior  $\mathcal{P} = \mathcal{N}(0, \sigma_w^2 I_{d_w})$ . Then for any hyperposterior  $\mathcal{Q}$ , any  $c_1, c_2 > 0$  and any  $\delta \in (0, 1]$  with probability  $\geq 1 - \delta$  we have,

$$\begin{aligned} er(\mathcal{Q}) \leq & c'_1 c'_2 \hat{er}(\mathcal{Q}) + \left( \sum_{i=1}^n \frac{c'_1 c'_2}{2c_2 n m_i \sigma_w^2} + \frac{c'_1}{2c_1 n \sigma_w^2} \right) \|w^Q\|^2 + \sum_{i=1}^n \frac{c'_1 c'_2}{2c_2 n m_i \sigma_w^2} \|\mathbb{E}_{w^P} w_i^Q - w^Q\|^2 \\ & + \sum_{i=1}^n \frac{c'_1 c'_2}{c_2 n m_i \sigma_w^2} \left( \frac{1}{2} + \log \frac{2n}{\delta} \right) + \frac{c'_1}{c_1 n \sigma_w^2} \log \frac{2}{\delta}, \end{aligned} \quad (3)$$

where  $c'_1 = \frac{c_1}{1-e^{-c_1}}$  and  $c'_2 = \frac{c_2}{1-e^{-c_2}}$ . To get a better understanding, we further simplify the notation and obtain that

$$\begin{aligned} er(\mathcal{Q}) \leq & c'_1 c'_2 \hat{er}(\mathcal{Q}) + \left( \sum_{i=1}^n \frac{c'_1 c'_2}{2c_2 n m_i \sigma_w^2} + \frac{c'_1}{2c_1 n \sigma_w^2} \right) \|w^Q\|^2 + \underbrace{\sum_{i=1}^n \frac{c'_1 c'_2}{2c_2 n m_i \sigma_w^2} \|\mathbb{E}_{w^P} w_i^Q - w^Q\|^2}_{\text{task-complexity}} \\ & + \text{const}(\delta, n, m_i, \sigma_w, c_1, c_2). \end{aligned} \quad (4)$$

135 See Appendix D.4 for the proof. Notice that the expected task generalization error is bounded by the  
 136 empirical multi-task error plus two complexity terms which measures the environment-complexity  
 137 and the task-complexity, respectively.

### 138 3 PAC-BAYES LOCALIZED META-LEARNING

#### 139 3.1 MOTIVATION AND OVERALL FRAMEWORK

140 Our motivation stems from a core challenge in PAC-Bayes meta-learning bound in (4), wherein  
 141 the task-complexity term  $\sum_{i=1}^n \frac{c'_1 c'_2}{2c_2 n m_i \sigma_w^2} \|\mathbb{E}_{w^P} w_i^Q - w^Q\|^2$ , which measures the closeness between  
 142 the mean of posterior and the mean of global hyperposterior for each task, is typically vital to the  
 143 generalization bound. Finding the tightest possible bound generally depends on minimizing this  
 144 term. It is obvious that the optimal  $w^Q$  is  $\sum_{i=1}^n \frac{c'_1 c'_2 \mathbb{E}_{w^P} w_i^Q}{2c_2 n m_i \sigma_w^2}$ . This solution for global hyperposterior is  
 145 required to satisfy the task similarity assumption that the optimal posteriors for each task are close  
 146 together and lie within a small subset of the model space. Under this circumstance, there exists a  
 147 global hyperposterior from which a good prior for any individual task is reachable. However, if the  
 148 optimal posteriors for each task are not related or even mutually exclusive, i.e., one optimal posterior  
 149 has a negative effect on another task, the global hyperposterior may impede the learning of some  
 150 tasks. Moreover, this complexity term could be inevitably large and incur large generalization error.

151 Note that  $w^Q$  is the mean of hyperposterior  $\mathcal{Q}$  and this complexity term naturally indicates the  
 152 divergence between the mean of prior  $w_i^P$  sampled from the hyperposterior  $\mathcal{Q}$  and the mean of  
 153 posterior  $w_i^Q$  in each task. Therefore, we propose to adaptively choose the mean of prior  $w_i^P$   
 154 according to task  $i$ . It is obvious that the complexity term vanishes if we set  $w_i^P = w_i^Q$ , but the prior  
 155  $P_i$  in each task has to be chosen independently of the sample set  $S_i$ . Fortunately, the PAC-Bayes

theorem allows us to choose prior upon the data distribution  $D_i$ . Therefore, we propose a prior predictor  $\Phi : D^m \rightarrow \mathbf{w}^P$  which receives task data distribution  $D^m$  and outputs the mean of prior  $\mathbf{w}^P$ . In this way, the generated priors could focus locally on those regions of model parameters that are of particular interest in solving specific tasks.

Particularly, the prior predictor is parameterized as  $\Phi_{\mathbf{v}}$  with  $\mathbf{v} \in \mathbb{R}^{d_v}$ . We assume  $\mathbf{v}$  to be a random variable distributed first according to the hyperprior  $\mathcal{P}$ , which we reformulate as  $\mathcal{N}(0, \sigma_{\mathbf{v}}^2 I_{d_v})$ , and later according to hyperposterior  $\mathcal{Q}$ , which we reformulate as  $\mathcal{N}(\mathbf{v}^Q, \sigma_{\mathbf{v}}^2 I_{d_v})$ . Given a new task  $i$ , we first sample  $\mathbf{v}$  from hyperposterior  $\mathcal{N}(\mathbf{v}^Q, \sigma_{\mathbf{v}}^2 I_{d_v})$  and estimate the mean of prior  $\mathbf{w}_i^P$  by leveraging prior predictor  $\mathbf{w}_i^P = \Phi_{\mathbf{v}}(D_i^m)$ . Then, the base learner utilizes the sample set  $S_i$  and the prior  $P_i = \mathcal{N}(\mathbf{w}_i^P, \sigma_{\mathbf{w}}^2 I_{d_w})$  to produce a mean posterior  $\mathbf{w}_i^Q = A_b(S_i, P_i)$ , as shown in Figure 2(right).

To make  $\mathbf{w}^P$  close to  $\mathbf{w}^Q$  in each task, what properties are the prior predictor is expected to exhibit? Importantly, it is required to (i) uncover the tight relationship between the sample set and model parameters. Intuitively, features and parameters yield similar local and global structures in their respective spaces in the classification problem. Features in the same category tend to be spatially clustered together while maintaining the separation between different classes. Take linear classifiers as an example, let  $\mathbf{w}_k$  be the parameters w.r.t. category  $k$ , the separability between classes is implemented as  $\mathbf{x} \cdot \mathbf{w}_k$ , which also explicitly encourages intra-class compactness. A reasonable choice of  $\mathbf{w}_k$  is to maximize the inner product distance with the input features in the same category and minimize the distance with the input features of the non-belonging categories. Besides, the prior predictor should be (ii) category-agnostic since it will be used continuously as new tasks and hence new categories become available. Lastly, it should be (iii) invariant under permutations of its inputs.

### 3.2 LCC-BASED PRIOR PREDICTOR

There exists many implementations, such as set transformer (Lee et al., 2018), relation network (Rusu et al., 2019), task2vec (Achille et al., 2019), that satisfy the above conditions. We follow the idea of *nearest class mean classifier* (Mensink et al., 2013), which represents class parameter by averaging its feature embeddings. This idea has been explored in transductive few-shot learning problems (Snell et al., 2017; Qiao et al., 2018). Snell et al. (2017) learn a metric space across tasks such that when represented in this embedding, prototype (centroid) of each class can be used for label prediction in the new task. Qiao et al. (2018) directly predict the classifier weights using the activations by exploiting the close relationship between the parameters and the activations in a neural network associated with the same category. In summary, the classification problem of each task is transformed as a generic metric learning problem which is shared across tasks. Once this mapping has been learned on observed tasks, due to the structure-preserving property, it could be easily generalized to new tasks. Formally, consider each task as a  $K$ -class classification problem, and the parameter of the classifier in task  $i$  denoted as  $\mathbf{w}_i = [\mathbf{w}_i[1], \dots, \mathbf{w}_i[k], \dots, \mathbf{w}_i[K]]$ , the prior predictor for class  $k$  can be defined as:

$$\mathbf{w}_i^P[k] = \Phi_{\mathbf{v}}(D_{ik}^{m_{ik}}) = \mathbb{E}_{S_{ik} \sim D_{ik}^{m_{ik}}} \frac{1}{m_{ik}} \sum_{\mathbf{x}_j \in S_{ik}} \phi_{\mathbf{v}}(\mathbf{x}_j), \quad (5)$$

where  $\phi_{\mathbf{v}}(\cdot) : \mathbb{R}^d \rightarrow \mathbb{R}^{d_w}$  is the feature embedding function,  $m_{ik}$  is the number of samples belonging to category  $k$ ,  $S_{ik}$  and  $D_{ik}$  are the sample set and data distribution for category  $k$  in task  $i$ . We call this function the *expected prior predictor*. Since data distribution  $D_{ik}$  is considered unknown and our only insight as to  $D_{ik}$  is through the sample set  $S_{ik}$ , we approximate the expected prior predictor by its empirical counterpart. Note that if the prior predictor is relatively stable to perturbations of the sample set, then the generated prior could still reflect the underlying task data distribution, rather than the data, resulting in a generalization bound that still holds perhaps with smaller probability (Dziugaite & Roy, 2018). Formally, the *empirical prior predictor* is defined as:

$$\hat{\mathbf{w}}_i^P[k] = \hat{\Phi}_{\mathbf{v}}(S_{ik}) = \frac{1}{m_{ik}} \sum_{\mathbf{x}_j \in S_{ik}} \phi_{\mathbf{v}}(\mathbf{x}_j). \quad (6)$$

Although we can implement the embedding function  $\phi_{\mathbf{v}}(\cdot)$  with a multilayer perceptron (MLP), both input  $\mathbf{x} \in \mathbb{R}^d$  and model parameter  $\mathbf{w} \in \mathbb{R}^{d_w}$  are high-dimensional, making the empirical prior predictor  $\hat{\Phi}_{\mathbf{v}}(\cdot)$  difficult to learn. Inspired by the local coordinate coding method, if the anchor points are sufficiently localized, the embedding function  $\phi_{\mathbf{v}}(x_j)$  can be approximated by a linear function w.r.t. a set of codings,  $[\gamma_{\mathbf{u}}(x_j)]_{\mathbf{u} \in C}$ . Accordingly, we propose an LCC-based prior predictor, which

is defined as:

$$\bar{\mathbf{w}}_i^P[k] = \bar{\Phi}_{\mathbf{v}}(S_{ik}) = \frac{1}{m_{ik}} \sum_{\mathbf{x}_j \in S_{ik}} \sum_{\mathbf{u} \in C} \gamma_{\mathbf{u}}(\mathbf{x}_j) \phi_{\mathbf{v}}(\mathbf{u}), \quad (7)$$

where  $\phi_{\mathbf{v}}(\mathbf{u}) \in \mathbb{R}^{d_{\mathbf{w}}}$  is the embedding of the corresponding anchor point  $\mathbf{u} \in C$ . As such, the parameters of LCC-based prior predictor w.r.t. category  $k$  can be represented as  $\mathbf{v}_k = [\phi_{\mathbf{v}_k}(\mathbf{u}_1), \phi_{\mathbf{v}_k}(\mathbf{u}_2), \dots, \phi_{\mathbf{v}_k}(\mathbf{u}_{|C|})]$ . Lemma 1 illustrates the approximation error between empirical prior predictor and LCC-based prior predictor.

**Lemma 1.** (Empirical Prior Predictor Approximation) *Given the definition of  $\hat{\mathbf{w}}_i^P[k]$  and  $\bar{\mathbf{w}}_i^P[k]$  in Eq. (6) and Eq. (7), let  $(\gamma, C)$  be an arbitrary coordinate coding on  $\mathbb{R}^d$  and  $\phi_{\mathbf{v}}(\cdot)$  be an  $(\alpha, \beta)$ -Lipschitz smooth function. We have for all  $\mathbf{x} \in \mathbb{R}^d$*

$$\|\hat{\mathbf{w}}_i^P[k] - \bar{\mathbf{w}}_i^P[k]\| \leq O_{\alpha, \beta}(\gamma, C) \quad (8)$$

where  $O_{\alpha, \beta}(\gamma, C) = \frac{1}{m_{ik}} \sum_{\mathbf{x}_j \in S_{ik}} (\alpha \|\mathbf{x}_j - \bar{\mathbf{x}}_j\| + \beta \sum_{\mathbf{u} \in C} \|\bar{\mathbf{x}}_j - \mathbf{u}\|^2)$  and  $\bar{\mathbf{x}}_j = \sum_{\mathbf{u} \in C} \gamma_{\mathbf{u}}(\mathbf{x}_j) \mathbf{u}$ .

See Appendix D.1 for the proof. Lemma 1 shows that a good LCC-based prior predictor should make  $\mathbf{x}$  close to its physical approximation  $\bar{\mathbf{x}}$  and should be localized. The complexity of LCC coding scheme depends on the number of anchor points  $|C|$ . We follow the optimization method in Yu et al. (2009) to find the coordinate coding  $(\gamma, C)$ , which is presented in Appendix B.

### 3.3 PAC-BAYES LOCALIZED META-LEARNING BOUND WITH GAUSSIAN RANDOMIZATION

In order to derive a PAC-Bayes generalization bound for localized meta-learning, we first bound the approximation error between expected prior predictor and LCC-based prior predictor.

**Lemma 2.** *Given the definition of  $\mathbf{w}^P$  and  $\bar{\mathbf{w}}^P$  in Eq. (5) and (7), let  $\mathcal{X}$  be a compact set with radius  $R$ , i.e.,  $\forall \mathbf{x}, \mathbf{x}' \in \mathcal{X}, \|\mathbf{x} - \mathbf{x}'\| \leq R$ . For any  $\delta \in (0, 1]$  with probability  $\geq 1 - \delta$ , we have*

$$\|\mathbf{w}^P - \bar{\mathbf{w}}^P\|^2 \leq \sum_{k=1}^K \left( \frac{\alpha R}{\sqrt{m_{ik}}} (1 + \sqrt{\frac{1}{2} \log(\frac{1}{\delta})}) + O_{\alpha, \beta}(\gamma, C) \right)^2.$$

See Appendix D.2 for the proof. Lemma 2 shows that the approximation error between expected prior predictor and LCC-based prior predictor depends on (i) the concentration of prior predictor and (ii) the quality of LCC coding scheme. The first term implies the number of samples for each category should be larger for better approximation. This is consistent with the results of estimating the center of mass (Cristianini & Shawe-Taylor, 2004). Based on Lemma 2, using the same Catoni's bound, we have the following PAC-Bayes LML bound.

**Theorem 2.** *Consider the localized meta-learning framework. Given the hyperprior  $\mathcal{P} = \mathcal{N}(0, \sigma_{\mathbf{v}}^2 I_{d_{\mathbf{v}}})$ , then for any hyperposterior  $\mathcal{Q}$ , any  $c_1, c_2 > 0$  and any  $\delta \in (0, 1]$  with probability  $\geq 1 - \delta$  we have,*

$$\begin{aligned} er(\mathcal{Q}) &\leq c'_1 c'_2 \hat{er}(\mathcal{Q}) + \left( \sum_{i=1}^n \frac{c'_1 c'_2}{2c_2 n m_i \sigma_{\mathbf{v}}^2} + \frac{c'_1}{2c_1 n \sigma_{\mathbf{v}}^2} \right) \|\mathbf{v}^{\mathcal{Q}}\|^2 + \sum_{i=1}^n \frac{c'_1 c'_2}{c_2 n m_i \sigma_{\mathbf{w}}^2} \|\mathbb{E}_{\mathbf{v}} \mathbf{w}_i^{\mathcal{Q}} - \bar{\Phi}_{\mathbf{v}^{\mathcal{Q}}}(S_i)\|^2 \\ &\quad + \sum_{i=1}^n \frac{c'_1 c'_2}{c_2 n m_i \sigma_{\mathbf{w}}^2} \left( \frac{1}{\sigma_{\mathbf{w}}^2} \sum_{k=1}^K \left( \frac{\alpha R}{\sqrt{m_{ik}}} (1 + \sqrt{\frac{1}{2} \log(\frac{4n}{\delta})}) + O_{\alpha, \beta}(\gamma, C) \right)^2 + d_{\mathbf{w}} K \left( \frac{\sigma_{\mathbf{v}}}{\sigma_{\mathbf{w}}} \right)^2 \right) \\ &\quad + \sum_{i=1}^n \frac{c'_1 c'_2}{c_2 n m_i \sigma_{\mathbf{w}}^2} \log \frac{4n}{\delta} + \frac{c'_1}{2c_1 n \sigma_{\mathbf{v}}^2} \log \frac{2}{\delta}, \end{aligned} \quad (9)$$

where  $c'_1 = \frac{c_1}{1 - e^{-c_1}}$  and  $c'_2 = \frac{c_2}{1 - e^{-c_2}}$ . To get a better understanding, we further simplify the notation and obtain that

$$\begin{aligned} er(\mathcal{Q}) &\leq c'_1 c'_2 \hat{er}(\mathcal{Q}) + \left( \sum_{i=1}^n \frac{c'_1 c'_2}{2c_2 n m_i \sigma_{\mathbf{v}}^2} + \frac{c'_1}{2c_1 n \sigma_{\mathbf{v}}^2} \right) \|\mathbf{v}^{\mathcal{Q}}\|^2 + \underbrace{\sum_{i=1}^n \frac{c'_1 c'_2}{c_2 n m_i \sigma_{\mathbf{w}}^2} \|\mathbb{E}_{\mathbf{v}} \mathbf{w}_i^{\mathcal{Q}} - \bar{\Phi}_{\mathbf{v}^{\mathcal{Q}}}(S_i)\|^2}_{\text{task-complexity}} \\ &\quad + \text{const}(\alpha, \beta, R, \delta, n, m_i, \sigma_{\mathbf{v}}, \sigma_{\mathbf{w}}, c_1, c_2). \end{aligned} \quad (10)$$

See appendix D.3 for the proof. Similarly to the regular meta-learning bound in Theorem 1, the expected task error  $er(\mathcal{Q})$  is bounded by the empirical task error  $\hat{er}(\mathcal{Q})$  plus the task-complexity and environment-complexity terms. The main innovation here is to exploit the potential to choose the mean of prior  $\mathbf{w}^P$  adaptively, based on task data  $S$ . Intuitively, if the selection of the LCC-based prior predictor is appropriate, it will narrow the divergence between the mean of prior  $\mathbf{w}_i^P$  sampled

from the hyperposterior  $\mathcal{Q}$  and the mean of posterior  $\mathbf{w}_i^Q$  in each task. Therefore, the bound can be tighter than the ones in the regular meta-learning (Pentina & Lampert, 2014; Amit & Meir, 2018). Our empirical study in Section 4 will illustrate that the algorithm derived from this bound can reduce task-complexity and thus achieve better performance than the methods derived from regular meta-learning bounds.

When one is choosing the number of anchor points  $|C|$ , there is a balance between accuracy and simplicity of prior predictor. As we increase  $|C|$ , it will essentially increase the expressive power of  $\bar{\Phi}_{\mathbf{v}}(\cdot)$  and reduce the task-complexity term  $\|\mathbb{E}_{\mathbf{v}} \mathbf{w}^Q - \bar{\Phi}_{\mathbf{v}}(S)\|^2$ . However, at the same time, it will increase the environment-complexity term  $\|\mathbf{v}^Q\|^2$  and make the bound loose. If we set  $|C|$  to 1, it degenerates to the regular meta-learning framework.

### 3.4 LOCALIZED META-LEARNING ALGORITHM

Since the bound in (9) holds uniformly w.r.t.  $\mathcal{Q}$ , the guarantees of Theorem 2 also hold for the resulting learned hyperposterior  $\mathcal{Q} = \mathcal{N}(\mathbf{v}^Q, \sigma_{\mathbf{v}}^2 I_{d_{\mathbf{v}}})$ , so the mean of prior  $\mathbf{w}^P$  sampled from the learned hyperposterior work well for future tasks. The PAC-Bayes localized meta-learning bound in (9) can be compactly written as  $\sum_{i=1}^n \mathbb{E}_{\mathbf{v}} \hat{e}r_i(Q_i = A_b(S_i, P)) + \alpha_1 \|\mathbf{v}^Q\|^2 + \sum_{i=1}^n \frac{\alpha_2}{m_i} \|\mathbb{E}_{\mathbf{v}} \mathbf{w}_i^Q - \bar{\Phi}_{\mathbf{v}}(S_i)\|^2$ , where  $\alpha_1, \alpha_2 > 0$  are hyperparameters. For task  $i$ , the learning algorithm  $A_b(\cdot)$  can be formulated as  $\mathbf{w}_i^* = \arg \min_{\mathbf{w}_i^Q} \mathbb{E}_{\mathbf{v}} \hat{e}r_i(Q_i = \mathcal{N}(\mathbf{w}_i^Q, \sigma_{\mathbf{w}}^2 I_{d_{\mathbf{w}}}))$ . To make fair comparison and guarantee the benefit of the proposed LML is not from using an improved optimization method, we follow the same learning algorithm in (Amit & Meir, 2018). Specifically, we jointly optimize the parameters of LCC-based prior predictor  $\mathbf{v}$  and the parameters of classifiers in each task  $\mathbf{w}_1, \mathbf{w}_2, \dots, \mathbf{w}_n$ , which is formulated as

$$\arg \min_{\mathbf{v}, \mathbf{w}_1, \dots, \mathbf{w}_n} \sum_{i=1}^n \mathbb{E}_{\mathbf{v}} \hat{e}r_i(\mathbf{w}_i) + \alpha_1 \|\mathbf{v}^Q\|^2 + \sum_{i=1}^n \frac{\alpha_2}{m_i} \|\mathbb{E}_{\mathbf{v}} \mathbf{w}_i^Q - \bar{\Phi}_{\mathbf{v}}(S_i)\|^2. \quad (11)$$

We can optimize  $\mathbf{v}$  and  $\mathbf{w}$  via mini-batch SGD. The details of the localized meta-learning algorithm is given in Appendix F. The expectation over Gaussian distribution and its gradient can be efficiently estimated by using the re-parameterization trick Kingma & Welling (2014); Rezende et al. (2014). For example, to sample  $\mathbf{w}$  from the posterior  $Q = \mathcal{N}(\mathbf{w}^Q, \sigma_{\mathbf{w}}^2 I_{d_{\mathbf{w}}})$ , we first draw  $\xi \sim \mathcal{N}(0, I_{d_{\mathbf{w}}})$  and then apply the deterministic function  $\mathbf{w}^Q + \xi \odot \sigma$ , where  $\odot$  is an element-wise multiplication.

## 4 EXPERIMENTS

**Datasets and Setup.** We use CIFAR-100 and Caltech-256 in our experiments. CIFAR-100 Krizhevsky (2009) contains 60,000 images from 100 fine-grained categories and 20 coarse-level categories. As in Zhou et al. (2018), we use 64, 16, and 20 classes for meta-training, meta-validation, and meta-testing, respectively. Caltech-256 has 30,607 color images from 256 classes Griffin et al. (2007). Similarly, we split the dataset into 150, 56 and 50 classes for meta-training, meta-validation, and meta-testing. We consider 5-way classification problem. Each task is generated by randomly sampling 5 categories and each category contains 50 samples. The base model uses the convolutional architecture in Finn et al. (2017), which consists of 4 convolutional layers, each with 32 filters and a fully-connected layer mapping to the number of classes on top. High dimensional data often lies on some low dimensional manifolds. We utilize an auto-encoder to extract the semantic information of image data and then construct the LCC scheme based on the embeddings. The parameters of prior predictor and base model are random perturbations in the form of Gaussian distribution.

We design two different meta-learning environment settings to validate the efficacy of the proposed method. The first one uses the pre-trained base model as an initialization, which utilizes all the meta-training classes (64-class classification in CIFAR-100 case) to train the feature extractor. The second one uses the random initialization. We compare the proposed **LML** method with **ML-PL** method Pentina & Lampert (2014), **ML-AM** method Amit & Meir (2018) and **ML-A** which is derived from Theorem 1. In all these methods, we use their main theorems about the generalization upper bound to derive the objective of the algorithm. To ensure a fair comparison, all approaches adopt the same network architecture and pre-trained feature extractor (more details can be found in Appendix E).

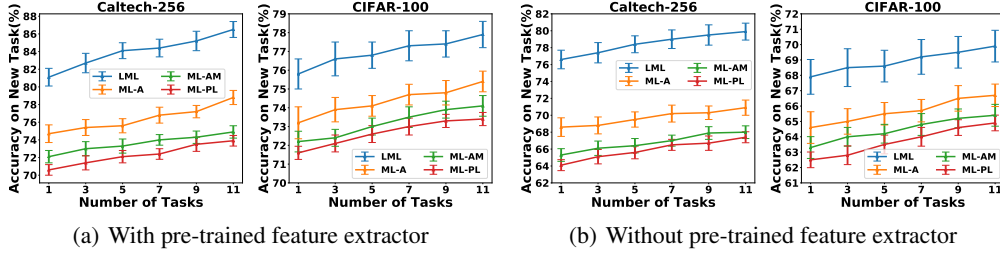Figure 3: Average test accuracy of learning a new task for varied numbers of training tasks ( $|C| = 64$ ).

**Results.** In Figure 3, we demonstrate the average test error of learning a new task based on the number of training tasks, together with the standard deviation, in different settings (with or without a pre-trained feature extractor). It is obvious that the performance continually increases as we increase the number of training tasks for all the methods. This is consistent with the generalization bounds that the complexity term converges to zero if large numbers of tasks are observed. ML-A consistently outperforms ML-PL and ML-AM since the single-task bound used in Theorem 1 (ML-A) converges at the rate of  $O(\frac{1}{m})$  while the bounds w.r.t. ML-PL and ML-AM converge at the rate of  $O(\frac{1}{\sqrt{m}})$ . This demonstrates the importance of using tight generalization bound. Moreover, our proposed LML significantly outperforms the baselines, which validates the effectiveness of the proposed LCC-based prior predictor. This confirms that LCC-based prior predictor is a more suitable representation for meta-knowledge than the traditional global hyperposterior in ML-A, ML-AM, and ML-PL. Finally, we observe that if the pre-trained feature extractor is provided, all of these methods do better than meta-training with random initialization. This is because the pre-trained feature extractor can be regarded as a data-dependent hyperprior. It is closer to the hyperposterior than the randomly initialized hyperprior. Therefore, it is able to reduce the environment complexity term and improves the generalization performance.

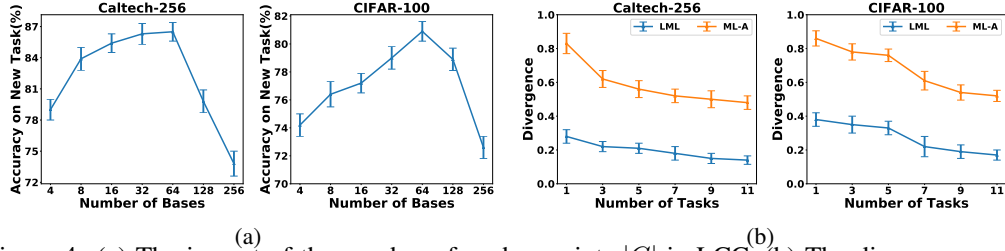Figure 4: (a) The impact of the number of anchor points  $|C|$  in LCC. (b) The divergence value (normalized) between the mean generated prior  $w^P$  and the mean of learned posterior  $w^Q$ .

In Figure 4(b), we show the divergence between the mean of generated prior  $w^P$  from meta model and the mean of learned posterior  $w^Q$  for LML and ML-A. This further validates the effectiveness of the LCC-based prior predictor which could narrow down the divergence term and thus tighten the bound. In Figure 4(a), we vary the number of anchor points  $|C|$  in LCC scheme from 4 to 256, the optimal value is around 64 in both datasets. This indicates that LML is sensitive to the number of anchor points  $|C|$ , which further affects the quality of LCC-based prior predictor and the performance of LML.

## 5 CONCLUSION

This work contributes a novel localized meta-learning framework from both the theoretical and computational perspectives. In order to tailor meta-knowledge to various individual task, we formulate meta model as a mapping function that leverages the samples in target set and produces task specific meta-knowledge as a prior. Quantitatively, this idea essentially provides a means to theoretically tighten the PAC-Bayes meta-learning generalization bound. We propose a LCC-based prior predictor to output localized meta-knowledge by using task information and further develop a practical algorithm with deep neural networks by minimizing the generalization bound. An interesting topic for future work would be to explore other principles to construct the prior predictor and apply the localized meta-learning framework to more realistic scenarios where tasks are sampled non-i.i.d. from an environment. Another challenging problem is to extend our techniques to derive localized meta-learning algorithms for regression and reinforcement learning problems.



## REFERENCES

- Alessandro Achille, Michael Lam, Rahul Tewari, Avinash Ravichandran, Subhansu Maji, Charles C Fowlkes, Stefano Soatto, and Pietro Perona. Task2vec: Task embedding for meta-learning. In *Proceedings of the IEEE International Conference on Computer Vision*, pp. 6430–6439, 2019.
- Ron Amit and Ron Meir. Meta-learning by adjusting priors based on extended PAC-Bayes theory. In *International Conference on Machine Learning*, pp. 205–214, 2018.
- Maria-Florina Balcan, Mikhail Khodak, and Ameet Talwalkar. Provable guarantees for gradient-based meta-learning. In *Proceedings of the 36th International Conference on Machine Learning, ICML 2019, 9-15 June 2019, Long Beach, California, USA*, pp. 424–433, 2019.
- Jonathan Baxter. A model of inductive bias learning. *Journal of Artificial Intelligence Research*, 12: 149–198, 2000.
- O Catoni. PAC-Bayesian supervised classification: The thermodynamics of statistical learning. institute of mathematical statistics lecture notes—monograph series 56. *IMS, Beachwood, OH. MR2483528*, 2007.
- Nello Cristianini and John Shawe-Taylor. *Kernel methods for pattern analysis*, volume 173. Cambridge University Press Cambridge, 2004.
- Giulia Denevi, Carlo Ciliberto, Dimitris Stamos, and Massimiliano Pontil. Incremental learning-to-learn with statistical guarantees. In *Proceedings of the Thirty-Fourth Conference on Uncertainty in Artificial Intelligence, UAI 2018, Monterey, California, USA, August 6-10, 2018*, pp. 457–466, 2018a.
- Giulia Denevi, Carlo Ciliberto, Dimitris Stamos, and Massimiliano Pontil. Learning to learn around a common mean. In *Advances in Neural Information Processing Systems*, pp. 10169–10179, 2018b.
- Giulia Denevi, Carlo Ciliberto, Riccardo Grazi, and Massimiliano Pontil. Learning-to-learn stochastic gradient descent with biased regularization. In *Proceedings of the 36th International Conference on Machine Learning, ICML 2019, 9-15 June 2019, Long Beach, California, USA*, pp. 1566–1575, 2019.
- Gintare Karolina Dziugaite and Daniel M Roy. Data-dependent PAC-Bayes priors via differential privacy. In *Advances in Neural Information Processing Systems*, pp. 8430–8441, 2018.
- Chelsea Finn, Pieter Abbeel, and Sergey Levine. Model-agnostic meta-learning for fast adaptation of deep networks. In *Proceedings of the 34th International Conference on Machine Learning-Volume 70*, pp. 1126–1135. JMLR. org, 2017.
- Tomer Galanti, Lior Wolf, and Tamir Hazan. A theoretical framework for deep transfer learning. *Information and Inference: A Journal of the IMA*, 5(2):159–209, 2016.
- Gregory Griffin, Alex Holub, and Pietro Perona. Caltech-256 object category dataset. 2007.
- Benjamin Guedj. A primer on pac-bayesian learning. *arXiv preprint arXiv:1901.05353*, 2019.
- Diederik P. Kingma and Jimmy Ba. Adam: A method for stochastic optimization. In *3rd International Conference on Learning Representations, ICLR 2015, San Diego, CA, USA, May 7-9, 2015, Conference Track Proceedings*, 2015.
- Diederik P. Kingma and Max Welling. Auto-encoding variational bayes. In *2nd International Conference on Learning Representations, ICLR 2014, Banff, AB, Canada, April 14-16, 2014, Conference Track Proceedings*, 2014.
- Alex Krizhevsky. Learning multiple layers of features from tiny images. Technical report, Citeseer, 2009.
- Juho Lee, Yoonho Lee, Jungtaek Kim, Adam R Kosiorek, Seungjin Choi, and Yee Whye Teh. Set transformer: A framework for attention-based permutation-invariant neural networks. *arXiv preprint arXiv:1810.00825*, 2018.

- 320 Guy Lever, François Laviolette, and John Shawe-Taylor. Tighter PAC-Bayes bounds through  
321 distribution-dependent priors. *Theoretical Computer Science*, 473:4–28, 2013.
- 322 Andreas Maurer. Algorithmic stability and meta-learning. *Journal of Machine Learning Research*, 6  
323 (Jun):967–994, 2005.
- 324 Thomas Mensink, Jakob Verbeek, Florent Perronnin, and Gabriela Csurka. Distance-based image  
325 classification: Generalizing to new classes at near-zero cost. *IEEE transactions on pattern analysis  
326 and machine intelligence*, 35(11):2624–2637, 2013.
- 327 Emilio Parrado-Hernández, Amiran Ambroladze, John Shawe-Taylor, and Shiliang Sun. PAC-Bayes  
328 bounds with data dependent priors. *Journal of Machine Learning Research*, 13(Dec):3507–3531,  
329 2012.
- 330 Anastasia Pentina and Christoph Lampert. A PAC-Bayesian bound for lifelong learning. In *Interna-  
331 tional Conference on Machine Learning*, pp. 991–999, 2014.
- 332 Siyuan Qiao, Chenxi Liu, Wei Shen, and Alan L. Yuille. Few-shot image recognition by predicting pa-  
333 rameters from activations. In *2018 IEEE Conference on Computer Vision and Pattern Recognition,  
334 CVPR 2018, Salt Lake City, UT, USA, June 18-22, 2018*, pp. 7229–7238, 2018.
- 335 Sachin Ravi and Hugo Larochelle. Optimization as a model for few-shot learning. In *5th Interna-  
336 tional Conference on Learning Representations, ICLR 2017, Toulon, France, April 24-26, 2017,  
337 Conference Track Proceedings*, 2017.
- 338 Danilo Jimenez Rezende, Shakir Mohamed, and Daan Wierstra. Stochastic backpropagation and  
339 approximate inference in deep generative models. In *Proceedings of the 31th International  
340 Conference on Machine Learning, ICML 2014, Beijing, China, 21-26 June 2014*, pp. 1278–1286,  
341 2014.
- 342 Omar Rivasplata, Csaba Szepesvari, John S Shawe-Taylor, Emilio Parrado-Hernandez, and Shiliang  
343 Sun. PAC-Bayes bounds for stable algorithms with instance-dependent priors. In *Advances in  
344 Neural Information Processing Systems*, pp. 9214–9224, 2018.
- 345 Andrei A. Rusu, Dushyant Rao, Jakub Sygnowski, Oriol Vinyals, Razvan Pascanu, Simon Osindero,  
346 and Raia Hadsell. Meta-learning with latent embedding optimization. In *7th International  
347 Conference on Learning Representations, ICLR 2019, New Orleans, LA, USA, May 6-9, 2019,  
348 2019*.
- 349 Jake Snell, Kevin Swersky, and Richard Zemel. Prototypical networks for few-shot learning. In  
350 *Advances in Neural Information Processing Systems*, pp. 4077–4087, 2017.
- 351 Sebastian Thrun and Lorien Pratt. *Learning to learn*. Springer Science & Business Media, 2012.
- 352 Oriol Vinyals, Charles Blundell, Timothy Lillicrap, Daan Wierstra, et al. Matching networks for one  
353 shot learning. In *Advances in neural information processing systems*, pp. 3630–3638, 2016.
- 354 Risto Vuorio, Shao-Hua Sun, Hexiang Hu, and Joseph J Lim. Toward multimodal model-agnostic  
355 meta-learning. *arXiv preprint arXiv:1812.07172*, 2018.
- 356 Xin Wang, Fisher Yu, Ruth Wang, Trevor Darrell, and Joseph E Gonzalez. Tafe-net: Task-aware  
357 feature embeddings for low shot learning. In *Proceedings of the IEEE Conference on Computer  
358 Vision and Pattern Recognition*, pp. 1831–1840, 2019.
- 359 Kai Yu, Tong Zhang, and Yihong Gong. Nonlinear learning using local coordinate coding. In  
360 *Advances in neural information processing systems*, pp. 2223–2231, 2009.
- 361 Fengwei Zhou, Bin Wu, and Zhenguo Li. Deep meta-learning: Learning to learn in the concept space.  
362 *arXiv preprint arXiv:1802.03596*, 2018.
- 363 Luisa M. Zintgraf, Kyriacos Shiarlis, Vitaly Kurin, Katja Hofmann, and Shimon Whiteson. Fast  
364 context adaptation via meta-learning. In *Proceedings of the 36th International Conference on  
365 Machine Learning, ICML 2019, 9-15 June 2019, Long Beach, California, USA*, pp. 7693–7702,  
366 2019.

# Supplementary Materials for Localized Meta-Learning: A PAC-Bayes Analysis for Meta-Learning Beyond Global Prior

This supplementary document contains the discussion of previous work, the technical proofs of theoretical results and details of experiments. It is structured as follows: Appendix A gives a detailed discussion of previous work. Appendix B presents the optimization method for LCC. Appendix C presents notations for prior predictor. Appendix D gives the proofs of the main results. Appendix D.1 and D.2 show the approximation error between LCC-based prior predictor and empirical prior predictor, expected prior predictor, respectively. They are used in the proof of Theorem 2. Next, in Appendix D.3 and D.4 we show the PAC-Bayes generalization bound of localized meta-learning in Theorem 2 and also provides the PAC-Bayes generalization bound of regular meta-learning in Theorem 1. Details of experiments and more empirical results are presented in Appendix E. Finally, we summarize the localized meta-learning algorithm in Appendix F.

## A RELATED WORK

**Meta-Learning.** Meta-learning literature commonly considers the empirical task error by directly optimizing a loss of meta learner across tasks in the training data. Recently, this has been successfully applied in a variety of models for few-shot learning Ravi & Larochelle (2017); Snell et al. (2017); Finn et al. (2017); Vinyals et al. (2016). Although Vuorio et al. (2018); Rusu et al. (2019); Zintgraf et al. (2019); Wang et al. (2019) consider task adaptation when using meta-knowledge for specific tasks, all of them are not based on generalization error bounds, which is the in the same spirit as our work. Meta-learning in the online setting has regained attention recently Denevi et al. (2018b;a; 2019); Balcan et al. (2019), in which online-to-batch conversion results could imply generalization bounds. Galanti et al. (2016) analyzes transfer learning in neural networks with PAC-Bayes tools. Most related to our work are Pentina & Lampert (2014); Amit & Meir (2018), which provide a PAC-Bayes generalization bound for meta-learning framework. In contrast, neither work provides a principled way to derive localized meta-knowledge for specific tasks.

**Localized PAC-Bayes Learning.** There has been a prosperous line of research for learning priors to improve the PAC-Bayes bounds Catoni (2007); Guedj (2019). Parrado-Hernández et al. (2012) showed that priors can be learned by splitting the available training data into two parts, one for learning the prior, one for learning the posterior. Lever et al. (2013) bounded the KL divergence by a term independent of data distribution and derived an expression for the overall optimal prior, i.e. the prior distribution resulting in the smallest bound value. Recently, Rivasplata et al. (2018) bounded the KL divergence by investigating the stability of the hypothesis. Dziugaite & Roy (2018) optimized the prior term in a differentially private way. In summary, these methods construct some quantities that reflect the underlying data distribution, rather than the sample set, and then choose the prior  $P$  based on these quantities. These works, however, are only applicable for single-task problem and could not transfer knowledge across tasks in meta-learning setting.

## B OPTIMIZATION OF LCC

We minimize the inequality in (8) to obtain a set of anchor points. As with Yu et al. (2009), we simplify the localization error term by assuming  $\bar{\mathbf{x}} = \mathbf{x}$ , and then we optimize the following objective function:

$$\arg \min_{\gamma, C} \sum_{i=1}^n \sum_{\mathbf{x}_j \in S_i} \alpha \|\mathbf{x}_j - \bar{\mathbf{x}}_j\|^2 + \beta \sum_{\mathbf{u} \in C} \|\mathbf{x}_j - \mathbf{u}\|^2 \quad s.t. \forall \mathbf{x}, \sum_{\mathbf{u} \in C} \gamma_{\mathbf{u}}(\mathbf{x}) = 1, \quad (12)$$

where  $\bar{\mathbf{x}} = \sum_{\mathbf{u} \in C} \gamma_{\mathbf{u}}(\mathbf{x}) \mathbf{u}$ . In practice, we update  $C$  and  $\gamma$  by alternately optimizing a LASSO problem and a least-square regression problem, respectively.

## C NOTATIONS

Let  $\phi_{\mathbf{v}}(\cdot) : \mathbb{R}^d \rightarrow \mathbb{R}^{d_w}$  be the feature embedding function.  $m_{ik}$  denotes the number of samples belonging to category  $k$ .  $S_{ik}$  and  $D_{ik}$  are the sample set and data distribution for category  $k$  in task  $i$ ,

respectively. Then, the expected prior predictor w.r.t. class  $k$  in task  $i$  is defined as:

$$\mathbf{w}_i^P[k] = \Phi_{\mathbf{v}}(D_{ik}^{m_{ik}}) = \mathbb{E}_{S_{ik} \sim D_{ik}^{m_{ik}}} \frac{1}{m_{ik}} \sum_{\mathbf{x}_j \in S_{ik}} \phi_{\mathbf{v}}(\mathbf{x}_j).$$

The empirical prior predictor w.r.t. class  $k$  in task  $i$  is defined as:

$$\hat{\mathbf{w}}_i^P[k] = \hat{\Phi}_{\mathbf{v}}(S_{ik}) = \frac{1}{m_{ik}} \sum_{\mathbf{x}_j \in S_{ik}} \phi_{\mathbf{v}}(\mathbf{x}_j).$$

The LCC-based prior predictor w.r.t. class  $k$  in task  $i$  is defined as:

$$\bar{\mathbf{w}}_i^P[k] = \bar{\Phi}_{\mathbf{v}}(S_{ik}) = \frac{1}{m_{ik}} \sum_{\mathbf{x}_j \in S_{ik}} \sum_{\mathbf{u} \in C} \gamma_{\mathbf{u}}(\mathbf{x}_j) \phi_{\mathbf{v}}(\mathbf{u}).$$

## 408 D THEORETICAL RESULTS

### 409 D.1 PROOF OF LEMMA 1

410 This lemma bounds the error between the empirical prior predictor  $\hat{\mathbf{w}}_i^P[k]$  and the LCC-based prior  
411 predictor  $\bar{\mathbf{w}}_i^P[k]$ .

**Lemma 1** Given the definition of  $\hat{\mathbf{w}}_i^P[k]$  and  $\bar{\mathbf{w}}_i^P[k]$  in Eq. (6) and Eq. (7), let  $(\gamma, C)$  be an arbitrary coordinate coding on  $\mathbb{R}^{d_x}$  and  $\phi$  be an  $(\alpha, \beta)$ -Lipschitz smooth function. We have for all  $\mathbf{x} \in \mathbb{R}^{d_x}$

$$\|\hat{\mathbf{w}}_i^P[k] - \bar{\mathbf{w}}_i^P[k]\| \leq \frac{1}{m_{ik}} \sum_{\mathbf{x}_j \in S_{ik}} \left( \alpha \|\mathbf{x}_j - \bar{\mathbf{x}}_j\| + \beta \sum_{\mathbf{u} \in C} \|\bar{\mathbf{x}}_j - \mathbf{u}\|^2 \right) = O_{\alpha, \beta}(\gamma, C), \quad (13)$$

412 where  $\bar{\mathbf{x}}_j = \sum_{\mathbf{u} \in C} \gamma_{\mathbf{u}}(\mathbf{x}_j) \mathbf{u}$ .

*Proof.* Let  $\bar{\mathbf{x}}_j = \sum_{\mathbf{u} \in C} \gamma_{\mathbf{u}}(\mathbf{x}_j) \mathbf{u}$ . We have

$$\begin{aligned} & \|\hat{\Phi}_{\mathbf{v}}(S_{ik}) - \bar{\Phi}_{\mathbf{v}}(S_{ik})\|_2 \\ &= \frac{1}{m_{ik}} \sum_{\mathbf{x}_j \in S_{ik}} \|\phi_{\mathbf{v}}(\mathbf{x}_j) - \sum_{\mathbf{u} \in C} \gamma_{\mathbf{u}}(\mathbf{x}_j) \phi_{\mathbf{v}}(\mathbf{u})\|_2 \\ &\leq \frac{1}{m_{ik}} \sum_{\mathbf{x}_j \in S_{ik}} \left( \|\phi_{\mathbf{v}}(\mathbf{x}_j) - \phi_{\mathbf{v}}(\bar{\mathbf{x}}_j)\|_2 + \left\| \sum_{\mathbf{u} \in C} \gamma_{\mathbf{u}}(\mathbf{x}_j) (\phi_{\mathbf{v}}(\mathbf{u}) - \phi_{\mathbf{v}}(\bar{\mathbf{x}}_j)) \right\|_2 \right) \\ &= \frac{1}{m_{ik}} \sum_{\mathbf{x}_j \in S_{ik}} \left( \|\phi_{\mathbf{v}}(\mathbf{x}_j) - \phi_{\mathbf{v}}(\bar{\mathbf{x}}_j)\|_2 + \left\| \sum_{\mathbf{u} \in C} \gamma_{\mathbf{u}}(\mathbf{x}_j) (\phi_{\mathbf{v}}(\mathbf{u}) - \phi_{\mathbf{v}}(\sum_{\mathbf{u} \in C} \gamma_{\mathbf{u}}(\mathbf{x}_j) \mathbf{u})) - \nabla \phi_{\mathbf{v}}(\bar{\mathbf{x}}_j)(\mathbf{u} - \bar{\mathbf{x}}_j) \right\|_2 \right) \\ &\leq \frac{1}{m_{ik}} \sum_{\mathbf{x}_j \in S_{ik}} \left( \|\phi_{\mathbf{v}}(\mathbf{x}_j) - \phi_{\mathbf{v}}(\bar{\mathbf{x}}_j)\|_2 + \sum_{\mathbf{u} \in C} |\gamma_{\mathbf{u}}(\mathbf{x}_j)| \left\| (\phi_{\mathbf{v}}(\mathbf{u}) - \phi_{\mathbf{v}}(\sum_{\mathbf{u} \in C} \gamma_{\mathbf{u}}(\mathbf{x}_j) \mathbf{u})) - \nabla \phi_{\mathbf{v}}(\bar{\mathbf{x}}_j)(\mathbf{u} - \bar{\mathbf{x}}_j) \right\|_2 \right) \\ &\leq \frac{1}{m_{ik}} \sum_{\mathbf{x}_j \in S_{ik}} \left( \alpha \|\mathbf{x}_j - \bar{\mathbf{x}}_j\|_2 + \beta \sum_{\mathbf{u} \in C} \|\bar{\mathbf{x}}_j - \mathbf{u}\|_2^2 \right) = O_{\alpha, \beta}(\gamma, C) \end{aligned}$$

413 In the above derivation, the first inequality holds by the triangle inequality. The second equality  
414 holds since  $\sum_{\mathbf{u} \in C} \gamma_{\mathbf{u}}(\mathbf{x}_j) = 1$  for all  $\mathbf{x}_j$ . The last inequality uses the assumption of  $(\alpha, \beta)$ -Lipschitz  
415 smoothness of  $\phi_{\mathbf{v}}(\cdot)$ . This implies the desired bound.  $\square$

This lemma demonstrates that the quality of LCC approximation is bounded by two terms: the first term  $\|\mathbf{x}_j - \bar{\mathbf{x}}_j\|_2$  indicates  $\mathbf{x}$  should be close to its physical approximation  $\bar{\mathbf{x}}$ , the second term  $\|\bar{\mathbf{x}}_j - \mathbf{u}\|$  implies that the coding should be localized. According to the Manifold Coding Theorem in Yu et al. (2009), if the data points  $\mathbf{x}$  lie on a compact smooth manifold  $\mathcal{M}$ . Then given any  $\epsilon > 0$ , there exists anchor points  $C \subset \mathcal{M}$  and coding  $\gamma$  such that

$$\frac{1}{m_{ik}} \sum_{\mathbf{x}_j \in S_{ik}} \left( \alpha \|\mathbf{x}_j - \bar{\mathbf{x}}_j\|_2 + \beta \sum_{\mathbf{u} \in C} \|\bar{\mathbf{x}}_j - \mathbf{u}\|_2^2 \right) \leq [\alpha c_{\mathcal{M}} + (1 + 5\sqrt{d_{\mathcal{M}}})\beta]\epsilon^2. \quad (14)$$

416 It shows that the approximation error of local coordinate coding depends on the intrinsic dimension  
417 of the manifold instead of the dimension of input.

## 418 D.2 PROOF OF LEMMA 2

419 In order to proof Lemma 2, we first introduce a relevant theorem.

**Theorem 3. (Vector-valued extension of McDiarmid’s inequality Rivasplata et al. (2018))** Let  $\mathbf{X}_1, \dots, \mathbf{X}_m \in \mathcal{X}$  be independent random variables, and  $f : \mathcal{X}^m \rightarrow \mathbb{R}^{d_w}$  be a vector-valued mapping function. If, for all  $i \in \{1, \dots, m\}$ , and for all  $\mathbf{x}_1, \dots, \mathbf{x}_m, \mathbf{x}'_i \in \mathcal{X}$ , the function  $f$  satisfies

$$\sup_{\mathbf{x}_i, \mathbf{x}'_i} \|f(\mathbf{x}_{1:i-1}, \mathbf{x}_i, \mathbf{x}_{i+1:m}) - f(\mathbf{x}_{1:i-1}, \mathbf{x}'_i, \mathbf{x}_{i+1:m})\| \leq c_i \quad (15)$$

Then  $\mathbb{E}\|f(\mathbf{X}_{1:m}) - \mathbb{E}[f(\mathbf{X}_{1:m})]\| \leq \sqrt{\sum_{i=1}^m c_i^2}$ . For any  $\delta \in (0, 1)$  with probability  $\geq 1 - \delta$  we have

$$\|f(\mathbf{X}_{1:m}) - \mathbb{E}[f(\mathbf{X}_{1:m})]\| \leq \sqrt{\sum_{i=1}^m c_i^2} + \sqrt{\frac{\sum_{i=1}^m c_i^2}{2} \log\left(\frac{1}{\delta}\right)}. \quad (16)$$

420 The above theorem indicates that bounded differences in norm implies the concentration of  $f(\mathbf{X}_{1:m})$   
 421 around its mean in norm, i.e.,  $\|f(\mathbf{X}_{1:m}) - \mathbb{E}[f(\mathbf{X}_{1:m})]\|$  is small with high probability.

422 Then, we bound the error between expected prior predictor  $\mathbf{w}_i^P$  and the empirical prior predictor  $\hat{\mathbf{w}}_i^P$ .

**Lemma 3.** Given the definition of  $\mathbf{w}_i^P[k]$  and  $\hat{\mathbf{w}}_i^P[k]$  in (5) and (6), let  $\mathcal{X}$  be a compact set with radius  $R$ , i.e.,  $\forall \mathbf{x}, \mathbf{x}' \in \mathcal{X}, \|\mathbf{x} - \mathbf{x}'\| \leq R$ . For any  $\delta \in (0, 1]$  with probability  $\geq 1 - \delta$ , we have

$$\|\mathbf{w}_i^P[k] - \hat{\mathbf{w}}_i^P[k]\| \leq \frac{\alpha R}{\sqrt{m_{ik}}} \left(1 + \sqrt{\frac{1}{2} \log\left(\frac{1}{\delta}\right)}\right). \quad (17)$$

*Proof.* According to the definition of  $\hat{\Phi}_{\mathbf{v}}(\cdot)$  in (6), for all points  $\mathbf{x}_1, \dots, \mathbf{x}_{j-1}, \mathbf{x}_{j+1}, \dots, \mathbf{x}_{m_k}, \mathbf{x}'_j$  in the sample set  $S_{ik}$ , we have

$$\begin{aligned} & \sup_{\mathbf{x}_i, \mathbf{x}'_i} \|\hat{\Phi}_{\mathbf{v}}(\mathbf{x}_{1:j-1}, \mathbf{x}_j, \mathbf{x}_{j+1:m_k}) - \hat{\Phi}_{\mathbf{v}}(\mathbf{x}_{1:j-1}, \mathbf{x}'_j, \mathbf{x}_{j+1:m_k})\| \\ &= \frac{1}{m_{ik}} \sup_{\mathbf{x}_j, \mathbf{x}'_j} \|\phi_{\mathbf{v}}(\mathbf{x}_j) - \phi_{\mathbf{v}}(\mathbf{x}'_j)\| \leq \frac{1}{m_{ik}} \sup_{\mathbf{x}_j, \mathbf{x}'_j} \alpha \|\mathbf{x}_j - \mathbf{x}'_j\| \leq \frac{\alpha R}{m_{ik}}, \end{aligned} \quad (18)$$

where  $R$  denotes the domain of  $\mathbf{x}$ , say  $R = \sup_{\mathbf{x}} \|\mathbf{x}\|$ . The first inequality follows from the Lipschitz smoothness condition of  $\Phi_{\mathbf{v}}(\cdot)$  and the second inequality follows by the definition of domain  $\mathcal{X}$ . Utilizing Theorem 3, for any  $\delta \in (0, 1]$  with probability  $\geq 1 - \delta$  we have

$$\|\mathbf{w}_i^P[k] - \hat{\mathbf{w}}_i^P[k]\| = \|\hat{\Phi}_{\mathbf{v}}(S_{ik}) - \mathbb{E}[\hat{\Phi}_{\mathbf{v}}(S_{ik})]\| \leq \frac{\alpha R}{\sqrt{m_{ik}}} \left(1 + \sqrt{\frac{1}{2} \log\left(\frac{1}{\delta}\right)}\right). \quad (19)$$

423 This implies the bound.  $\square$

424 Lemma 3 shows that the bounded difference of function  $\Phi_{\mathbf{v}}(\cdot)$  implies its concentration, which can  
 425 be further used to bound the differences between empirical prior predictor  $\bar{\mathbf{w}}_i^P[k]$  and expected prior  
 426 predictor  $\mathbf{w}_i^P[k]$ . Now, we bound the error between expected prior predictor  $\mathbf{w}_i^P$  and the LCC-based  
 427 prior predictor  $\bar{\mathbf{w}}_i^P$ .

**Lemma 2** Given the definition of  $\mathbf{w}_i^P$  and  $\bar{\mathbf{w}}_i^P$  in (5) and (7), let  $\mathcal{X}$  be a compact set with radius  $R$ , i.e.,  $\forall \mathbf{x}, \mathbf{x}' \in \mathcal{X}, \|\mathbf{x} - \mathbf{x}'\| \leq R$ . For any  $\delta \in (0, 1]$  with probability  $\geq 1 - \delta$ , we have

$$\|\mathbf{w}_i^P - \bar{\mathbf{w}}_i^P\|^2 \leq \sum_{k=1}^K \left( \frac{\alpha R}{\sqrt{m_{ik}}} \left(1 + \sqrt{\frac{1}{2} \log\left(\frac{1}{\delta}\right)}\right) + O_{\alpha, \beta}(\gamma, C) \right)^2. \quad (20)$$

**Proof** According to the definition of  $\mathbf{w}^P$ ,  $\bar{\mathbf{w}}^P$  and  $\hat{\mathbf{w}}^P$ , we have

$$\begin{aligned}
& \|\mathbf{w}_i^P - \bar{\mathbf{w}}_i^P\|^2 \\
&= \sum_{k=1}^K \|\mathbf{w}_i^P[k] - \bar{\mathbf{w}}_i^P[k]\|^2 \\
&= \sum_{k=1}^K \|\mathbb{E}[\hat{\Phi}_{\mathbf{v}}(S_{ik})] - \hat{\Phi}_{\mathbf{v}}(S_{ik}) + \hat{\Phi}_{\mathbf{v}}(S_{ik}) - \bar{\Phi}_{\mathbf{v}}(S_{ik})\|^2 \\
&= \sum_{k=1}^K \left( \|\mathbb{E}[\hat{\Phi}_{\mathbf{v}}(S_{ik})] - \hat{\Phi}_{\mathbf{v}}(S_{ik})\|^2 + \|\hat{\Phi}_{\mathbf{v}}(S_{ik}) - \bar{\Phi}_{\mathbf{v}}(S_{ik})\|^2 + 2(\mathbb{E}[\hat{\Phi}_{\mathbf{v}}(S_{ik})] - \hat{\Phi}_{\mathbf{v}}(S_{ik}))^\top (\hat{\Phi}_{\mathbf{v}}(S_{ik}) - \bar{\Phi}_{\mathbf{v}}(S_{ik})) \right) \\
&\leq \sum_{k=1}^K \left( \|\mathbb{E}[\hat{\Phi}_{\mathbf{v}}(S_{ik})] - \hat{\Phi}_{\mathbf{v}}(S_{ik})\|^2 + \|\hat{\Phi}_{\mathbf{v}}(S_{ik}) - \bar{\Phi}_{\mathbf{v}}(S_{ik})\|^2 + 2\|\mathbb{E}[\hat{\Phi}_{\mathbf{v}}(S_{ik})] - \hat{\Phi}_{\mathbf{v}}(S_{ik})\| \|\hat{\Phi}_{\mathbf{v}}(S_{ik}) - \bar{\Phi}_{\mathbf{v}}(S_{ik})\| \right).
\end{aligned} \tag{21}$$

Substitute Lemma 3 and Lemma 1 into the above inequality, we can derive

$$\mathbb{P}_{S_{ik} \sim D_k^{m_k}} \left\{ \|\mathbf{w}^P - \bar{\mathbf{w}}^P\|^2 \leq \sum_{k=1}^K \left( \frac{\alpha R}{\sqrt{m_{ik}}} (1 + \sqrt{\frac{1}{2} \log(\frac{1}{\delta})}) + O_{\alpha, \beta}(\gamma, C) \right)^2 \right\} \geq 1 - \delta. \tag{22}$$

428 This gives the assertion.

429 Lemma 2 shows that the approximation error between expected prior predictor and LCC-based prior  
 430 predictor depends on the number of samples in each category and the quality of the LCC coding  
 431 scheme.

### 432 D.3 PROOF OF THEOREM 2

**Theorem 3** Let  $Q$  be the posterior of base learner  $Q = \mathcal{N}(\mathbf{w}^Q, \sigma_{\mathbf{w}}^2 I_{d_{\mathbf{w}}})$  and  $P$  be the prior  $\mathcal{N}(\bar{\Phi}_{\mathbf{v}}(S), \sigma_{\mathbf{w}}^2 I_{d_{\mathbf{w}}})$ . The mean of prior is produced by the LCC-based prior predictor  $\bar{\Phi}_{\mathbf{v}}(S)$  in Eq. (7) and its parameter  $\mathbf{v}$  is sampled from the hyperposterior of meta learner  $\mathcal{Q} = \mathcal{N}(\mathbf{v}^Q, \sigma_{\mathbf{v}}^2 I_{d_{\mathbf{v}}})$ . Given the hyperprior  $\mathcal{P} = \mathcal{N}(0, \sigma_{\mathbf{v}}^2 I_{d_{\mathbf{v}}})$ , then for any hyperposterior  $\mathcal{Q}$ , any  $c_1, c_2 > 0$  and any  $\delta \in (0, 1]$  with probability  $\geq 1 - \delta$  we have,

$$\begin{aligned}
er(\mathcal{Q}) &\leq c'_1 c'_2 \hat{er}(\mathcal{Q}) + \left( \sum_{i=1}^n \frac{c'_1 c'_2}{2c_2 n m_i \sigma_{\mathbf{v}}^2} + \frac{c'_1}{2c_1 n \sigma_{\mathbf{v}}^2} \right) \|\mathbf{v}^Q\|^2 + \sum_{i=1}^n \frac{c'_1 c'_2}{c_2 n m_i \sigma_{\mathbf{w}}^2} \|\mathbb{E}_{\mathbf{v}} \mathbf{w}_i^Q - \bar{\Phi}_{\mathbf{v}^Q}(S_i)\|^2 \\
&\quad + \sum_{i=1}^n \frac{c'_1 c'_2}{c_2 n m_i \sigma_{\mathbf{w}}^2} \left( \frac{1}{\sigma_{\mathbf{w}}^2} \sum_{k=1}^K \left( \frac{\alpha R}{\sqrt{m_{ik}}} (1 + \sqrt{\frac{1}{2} \log(\frac{4n}{\delta})}) + O_{\alpha, \beta}(\gamma, C) \right)^2 + d_{\mathbf{w}} K \left( \frac{\sigma_{\mathbf{v}}}{\sigma_{\mathbf{w}}} \right)^2 \right) \\
&\quad + \sum_{i=1}^n \frac{c'_1 c'_2}{c_2 n m_i \sigma_{\mathbf{w}}^2} \log \frac{4n}{\delta} + \frac{c'_1}{2c_1 n \sigma_{\mathbf{v}}^2} \log \frac{2}{\delta},
\end{aligned} \tag{23}$$

where  $c'_1 = \frac{c_1}{1-e^{-c_1}}$  and  $c'_2 = \frac{c_2}{1-e^{-c_2}}$ . We can simplify the notation and obtain that

$$\begin{aligned}
er(\mathcal{Q}) &\leq c'_1 c'_2 \hat{er}(\mathcal{Q}) + \left( \sum_{i=1}^n \frac{c'_1 c'_2}{2c_2 n m_i \sigma_{\mathbf{v}}^2} + \frac{c'_1}{2c_1 n \sigma_{\mathbf{v}}^2} \right) \|\mathbf{v}^Q\|^2 + \sum_{i=1}^n \frac{c'_1 c'_2}{c_2 n m_i \sigma_{\mathbf{w}}^2} \|\mathbb{E}_{\mathbf{v}} \mathbf{w}_i^Q - \bar{\Phi}_{\mathbf{v}^Q}(S_i)\|^2 \\
&\quad + \text{const}(\alpha, \beta, R, \delta, n, m_i).
\end{aligned} \tag{24}$$

433 **Proof** Our proof contains two steps. First, we bound the error within observed tasks due to observing  
 434 a limited number of samples. Then we bound the error on the task environment level due to observing  
 435 a finite number of tasks. Both of the two steps utilize Catoni's classical PAC-Bayes bound Catoni  
 436 (2007) to measure the error. We give here a general statement of the Catoni's classical PAC-Bayes  
 437 bound.

**Theorem 4. (Classical PAC-Bayes bound, general notations)** Let  $\mathcal{X}$  be a sample space and  $\mathbb{X}$  be some distribution over  $\mathcal{X}$ , and let  $\mathcal{F}$  be a hypotheses space of functions over  $\mathcal{X}$ . Define a loss function  $g(f, X) : \mathcal{F} \times \mathcal{X} \rightarrow [0, 1]$ , and let  $X_1^G \triangleq \{X_1, \dots, X_G\}$  be a sequence of  $G$  independent random

variables distributed according to  $\mathbb{X}$ . Let  $\pi$  be some prior distribution over  $\mathcal{F}$  (which must not depend on the samples  $X_1, \dots, X_G$ ). For any  $\delta \in (0, 1]$ , the following bounds holds uniformly for all posterior distribution  $\rho$  over  $\mathcal{F}$  (even sample dependent),

$$\mathbb{P}_{X_1^G \sim \mathbb{X}} \left\{ \mathbb{E}_{X \sim \mathbb{X}} \mathbb{E}_{f \sim \rho} g(f, X) \leq \frac{c}{1 - e^{-c}} \left[ \frac{1}{G} \sum_{g=1}^G \mathbb{E}_{f \sim \rho} g(f, X_g) + \frac{KL(\rho || \pi) + \log \frac{1}{\delta}}{G \times c} \right], \forall \rho \right\} \geq 1 - \delta. \quad (25)$$

**First step** We utilize Theorem 4 to bound the generalization error in each of the observed tasks. Let  $i \in 1, \dots, n$  be the index of task. For task  $i$ , we substitute the following definition into the Catoni's PAC-Bayes Bound. Specifically,  $X_g \triangleq (\mathbf{x}_{ij}, y_{ij})$ ,  $K \triangleq m_i$  denote the samples and  $\mathbb{X} \triangleq D_i$  denotes the data distribution. We instantiate the hypotheses with a hierarchical model  $f \triangleq (\mathbf{v}, \mathbf{w})$ , where  $\mathbf{v} \in \mathbb{R}^{d_v}$  and  $\mathbf{w} \in \mathbb{R}^{d_w}$  are the parameters of meta learner (prior predictor)  $\Phi_{\mathbf{v}}(\cdot)$  and base learner  $h(\cdot)$  respectively. The loss function only considers the base learner, which is defined as  $g(f, X) \triangleq \ell(h_{\mathbf{w}}(\mathbf{x}), y)$ . The prior over model parameter is represented as  $\pi \triangleq (\mathcal{P}, P) \triangleq (\mathcal{N}(0, \sigma_{\mathbf{v}}^2 I_{d_v}), \mathcal{N}(\mathbf{w}^P, \sigma_{\mathbf{w}}^2 I_{d_w}))$ , a Gaussian distribution (hyperprior of meta learner) centered at 0 and a Gaussian distribution (prior of base learner) centered at  $\mathbf{w}^P$ , respectively. We set the posterior to  $\rho \triangleq (\mathcal{Q}, Q) \triangleq (\mathcal{N}(\mathbf{v}^Q, \sigma_{\mathbf{v}}^2 I_{d_v}), \mathcal{N}(\mathbf{w}^Q, \sigma_{\mathbf{w}}^2 I_{d_w}))$ , a Gaussian distribution (hyperposterior of meta learner) centered at  $\mathbf{v}^Q$  and a Gaussian distribution (posterior of base learner) centered at  $\mathbf{w}^Q$ . According to Theorem 4, the generalization bound holds for any posterior distribution including the one generated in our localized meta-learning framework. Specifically, we first sample  $\mathbf{v}$  from hyperposterior  $\mathcal{N}(\mathbf{v}^Q, \sigma_{\mathbf{v}}^2 I_{d_v})$  and estimate  $\mathbf{w}^P$  by leveraging expected prior predictor  $\mathbf{w}^P = \Phi_{\mathbf{v}}(D)$ . The base learner algorithm  $A_b(S, P)$  utilizes the sample set  $S$  and the prior  $P = \mathcal{N}(\mathbf{w}^P, \sigma_{\mathbf{w}}^2 I_{d_w})$  to produce a posterior  $Q = A_b(S, P) = \mathcal{N}(\mathbf{w}^Q, \sigma_{\mathbf{w}}^2 I_{d_w})$ . Then we sample base learner parameter  $\mathbf{w}$  from posterior  $\mathcal{N}(\mathbf{w}^Q, \sigma_{\mathbf{w}}^2 I_{d_w})$  and compute the incurred loss  $\ell(h_{\mathbf{w}}(\mathbf{x}), y)$ . On the whole, meta-learning algorithm  $A_m(S_1, \dots, S_n, \mathcal{P})$  observes a series of tasks  $S_1, \dots, S_n$  and adjusts its hyperprior  $P = \mathcal{N}(\mathbf{w}^P, \sigma_{\mathbf{w}}^2 I_{d_w})$  into hyperposterior  $\mathcal{Q} = A_m(S_1, \dots, S_n, \mathcal{P}) = \mathcal{N}(\mathbf{v}^Q, \sigma_{\mathbf{v}}^2 I_{d_v})$ .

The KL divergence term between prior  $\pi$  and posterior  $\rho$  is computed as follows:

$$\begin{aligned} KL(\rho || \pi) &= \mathbb{E}_{f \sim \rho} \log \frac{\rho(f)}{\pi(f)} = \mathbb{E}_{\mathbf{v} \sim \mathcal{N}(\mathbf{v}^Q, \sigma_{\mathbf{v}}^2 I_{d_v})} \mathbb{E}_{\mathbf{w} \sim \mathcal{N}(\mathbf{w}^Q, \sigma_{\mathbf{w}}^2 I_{d_w})} \log \frac{\mathcal{N}(\mathbf{v}^Q, \sigma_{\mathbf{v}}^2 I_{d_v}) \mathcal{N}(\mathbf{w}^Q, \sigma_{\mathbf{w}}^2 I_{d_w})}{\mathcal{N}(0, \sigma_{\mathbf{v}}^2 I_{d_v}) \mathcal{N}(\mathbf{w}^P, \sigma_{\mathbf{w}}^2 I_{d_w})} \\ &= \mathbb{E}_{\mathbf{v} \sim \mathcal{N}(\mathbf{v}^Q, \sigma_{\mathbf{v}}^2 I_{d_v})} \log \frac{\mathcal{N}(\mathbf{v}^Q, \sigma_{\mathbf{v}}^2 I_{d_v})}{\mathcal{N}(0, \sigma_{\mathbf{v}}^2 I_{d_v})} + \mathbb{E}_{\mathbf{v} \sim \mathcal{N}(\mathbf{v}^Q, \sigma_{\mathbf{v}}^2 I_{d_v})} \mathbb{E}_{\mathbf{w} \sim \mathcal{N}(\mathbf{w}^Q, \sigma_{\mathbf{w}}^2 I_{d_w})} \log \frac{\mathcal{N}(\mathbf{w}^Q, \sigma_{\mathbf{w}}^2 I_{d_w})}{\mathcal{N}(\mathbf{w}^P, \sigma_{\mathbf{w}}^2 I_{d_w})} \\ &= \frac{1}{2\sigma_{\mathbf{v}}^2} \|\mathbf{v}^Q\|^2 + \mathbb{E}_{\mathbf{v} \sim \mathcal{N}(\mathbf{v}^Q, \sigma_{\mathbf{v}}^2 I_{d_v})} \frac{1}{2\sigma_{\mathbf{w}}^2} \|\mathbf{w}^Q - \mathbf{w}^P\|^2. \end{aligned} \quad (26)$$

In our localized meta-learning framework, in order to make  $KL(Q || P)$  small, the center of prior distribution  $\mathbf{w}^P$  is generated by the expected prior predictor  $\mathbf{w}^P = \Phi_{\mathbf{v}}(D)$ . However, the data distribution  $D$  is considered unknown and our only insight as to  $D_{ik}$  is through the sample set  $S_{ik}$ . In this work, we approximate the expected prior predictor  $\Phi_{\mathbf{v}}(D)$  with the LCC-based prior predictor  $\bar{\mathbf{w}}^P = \Phi_{\mathbf{v}}(S)$ . Denote the term  $\mathbb{E}_{\mathbf{v} \sim \mathcal{N}(\mathbf{v}^Q, \sigma_{\mathbf{v}}^2 I_{d_v})} \frac{1}{2\sigma_{\mathbf{w}}^2} \|\mathbf{w}^Q - \mathbf{w}^P\|^2$  by  $\mathbb{E}_{\mathbf{v}} \frac{1}{2\sigma_{\mathbf{w}}^2} \|\mathbf{w}^Q - \mathbf{w}^P\|^2$

for convenience, we have

$$\begin{aligned} \mathbb{E}_{\mathbf{v}} \frac{1}{2\sigma_{\mathbf{w}}^2} \|\mathbf{w}^Q - \mathbf{w}^P\|^2 &= \mathbb{E}_{\mathbf{v}} \frac{1}{2\sigma_{\mathbf{w}}^2} \|\mathbf{w}^Q - \bar{\mathbf{w}}^P + \bar{\mathbf{w}}^P - \mathbf{w}^P\|^2 \\ &= \mathbb{E}_{\mathbf{v}} \frac{1}{2\sigma_{\mathbf{w}}^2} [\|\mathbf{w}^Q - \bar{\mathbf{w}}^P\|^2 + \|\bar{\mathbf{w}}^P - \mathbf{w}^P\|^2 + 2(\mathbf{w}^Q - \bar{\mathbf{w}}^P)^\top (\bar{\mathbf{w}}^P - \mathbf{w}^P)] \\ &\leq \mathbb{E}_{\mathbf{v}} \frac{1}{2\sigma_{\mathbf{w}}^2} [\|\mathbf{w}^Q - \bar{\mathbf{w}}^P\|^2 + \|\bar{\mathbf{w}}^P - \mathbf{w}^P\|^2 + 2\|\mathbf{w}^Q - \bar{\mathbf{w}}^P\| \|\bar{\mathbf{w}}^P - \mathbf{w}^P\|] \\ &\leq \frac{1}{\sigma_{\mathbf{w}}^2} \mathbb{E}_{\mathbf{v}} \|\mathbf{w}^Q - \bar{\mathbf{w}}^P(S)\|^2 + \frac{1}{\sigma_{\mathbf{w}}^2} \mathbb{E}_{\mathbf{v}} \|\bar{\mathbf{w}}^P - \mathbf{w}^P\|^2. \end{aligned} \quad (27)$$

Since  $\bar{\mathbf{w}}_i^P = \bar{\Phi}_{\mathbf{v}}(S_i) = [\bar{\Phi}_{\mathbf{v}}(S_{i1}), \dots, \bar{\Phi}_{\mathbf{v}}(S_{ik}), \dots, \bar{\Phi}_{\mathbf{v}}(S_{iK})]$ , we have

$$\begin{aligned} \mathbb{E}_{\mathbf{v}} \|\mathbf{w}_i^Q - \bar{\Phi}_{\mathbf{v}}(S_i)\|^2 &= \sum_{k=1}^K \mathbb{E}_{\mathbf{v}} \|\mathbf{w}_i^Q[k] - \bar{\Phi}_{\mathbf{v}}(S_{ik})\|^2 \\ &= \sum_{k=1}^K \left( \mathbb{E}_{\mathbf{v}} \|\mathbf{w}_i^Q[k]\|^2 - 2(\mathbb{E}_{\mathbf{v}} \mathbf{w}_i^Q[k])^\top (\bar{\Phi}_{\mathbf{v}}(S_{ik})) + \|\bar{\Phi}_{\mathbf{v}}(S_{ik})\|^2 + \mathbb{V}[\|\bar{\Phi}_{\mathbf{v}}(S_{ik})\|] \right) \\ &= \sum_{k=1}^K \left( \|\mathbb{E}_{\mathbf{v}} \mathbf{w}_i^Q[k] - \bar{\Phi}_{\mathbf{v}}(S_{ik})\|^2 + \frac{d_{\mathbf{v}}}{|C|} \sigma_{\mathbf{v}}^2 \right) \\ &= \|\mathbb{E}_{\mathbf{v}} \mathbf{w}_i^Q - \bar{\Phi}_{\mathbf{v}}(S_i)\|^2 + d_{\mathbf{w}} K \sigma_{\mathbf{v}}^2, \end{aligned} \quad (28)$$

where  $\mathbb{V}[\|\bar{\Phi}_{\mathbf{v}}(S_{ik})\|]$  denotes the variance of  $\|\bar{\Phi}_{\mathbf{v}}(S_{ik})\|$ . The last equality uses the fact that  $d_{\mathbf{v}} = |C|d_{\mathbf{w}}$ . Combining Lemma 2, for any  $\delta' \in (0, 1]$  with probability  $\geq 1 - \delta'$  we have

$$\begin{aligned} &\frac{\mathbb{E}_{\mathbf{v}}}{2\sigma_{\mathbf{w}}^2} \|\mathbf{w}_i^Q - \mathbf{w}_i^P\|^2 \\ &\leq \frac{1}{\sigma_{\mathbf{w}}^2} \|\mathbb{E}_{\mathbf{v}} \mathbf{w}_i^Q - \bar{\Phi}_{\mathbf{v}}(S_i)\|^2 + d_{\mathbf{w}} K \left( \frac{\sigma_{\mathbf{v}}}{\sigma_{\mathbf{w}}} \right)^2 + \frac{1}{\sigma_{\mathbf{w}}^2} \sum_{k=1}^K \left( \frac{\alpha R}{\sqrt{m_{ik}}} (1 + \sqrt{\frac{1}{2} \log(\frac{1}{\delta})}) + O_{\alpha, \beta}(\gamma, C) \right)^2 \end{aligned} \quad (29)$$

Then, according to Theorem 4, we obtain that for any  $\frac{\delta_i}{2} > 0$

$$\begin{aligned} &\mathbb{P}_{S_i \sim D_i^{m_i}} \left\{ (\mathbf{x}, y) \sim D_i, \mathbf{v} \sim \mathcal{N}(\mathbf{v}^Q, \sigma_{\mathbf{v}}^2 I_{d_{\mathbf{v}}}), \mathbf{w} \sim \mathcal{N}(\mathbf{w}^Q, \sigma_{\mathbf{w}}^2 I_{d_{\mathbf{w}}}) \mid \ell(h_{\mathbf{w}}(\mathbf{x}), y) \right. \\ &\leq \frac{c_2}{1 - e^{-c_2}} \cdot \frac{1}{m_i} \sum_{j=1}^{m_i} \mathbb{E}_{\mathbf{v} \sim \mathcal{N}(\mathbf{v}^Q, \sigma_{\mathbf{v}}^2 I_{d_{\mathbf{v}}})} \mathbb{E}_{\mathbf{w} \sim \mathcal{N}(\mathbf{w}^Q, \sigma_{\mathbf{w}}^2 I_{d_{\mathbf{w}}})} \ell(h_{\mathbf{w}}(\mathbf{x}_j), y_j) \\ &\quad \left. + \frac{1}{(1 - e^{-c_2}) \cdot m_i} \left( \frac{1}{2\sigma_{\mathbf{v}}^2} \|\mathbf{v}^Q\|^2 + \frac{1}{\sigma_{\mathbf{w}}^2} \|\mathbf{w}_i^Q - \mathbf{w}_i^P\|^2 + \log \frac{2}{\delta_i} \right), \forall \mathcal{Q} \right\} \geq 1 - \frac{\delta_i}{2}, \end{aligned} \quad (30)$$

for all observed tasks  $i = 1, \dots, n$ . Define  $\delta' = \frac{\delta_i}{2}$  and combine inequality (29), we obtain

$$\begin{aligned} &\mathbb{P}_{S_i \sim D_i^{m_i}} \left\{ (\mathbf{x}, y) \sim D_i, \mathbf{v} \sim \mathcal{N}(\mathbf{v}^Q, \sigma_{\mathbf{v}}^2 I_{d_{\mathbf{v}}}), \mathbf{w} \sim \mathcal{N}(\mathbf{w}^Q, \sigma_{\mathbf{w}}^2 I_{d_{\mathbf{w}}}) \mid \ell(h_{\mathbf{w}}(\mathbf{x}), y) \right. \\ &\leq \frac{c_2}{1 - e^{-c_2}} \cdot \frac{1}{m_i} \sum_{j=1}^{m_i} \mathbb{E}_{\mathbf{v} \sim \mathcal{N}(\mathbf{v}^Q, \sigma_{\mathbf{v}}^2 I_{d_{\mathbf{v}}})} \mathbb{E}_{\mathbf{w} \sim \mathcal{N}(\mathbf{w}^Q, \sigma_{\mathbf{w}}^2 I_{d_{\mathbf{w}}})} \ell(h_{\mathbf{w}}(\mathbf{x}_j), y_j) \\ &\quad + \frac{1}{(1 - e^{-c_2}) m_i} \cdot \left( \frac{1}{2\sigma_{\mathbf{v}}^2} \|\mathbf{v}^Q\|^2 + \frac{1}{\sigma_{\mathbf{w}}^2} \|\mathbb{E}_{\mathbf{v}} \mathbf{w}_i^Q - \bar{\Phi}_{\mathbf{v}}(S_i)\|^2 + \log \frac{2}{\delta_i} + d_{\mathbf{w}} K \left( \frac{\sigma_{\mathbf{v}}}{\sigma_{\mathbf{w}}} \right)^2 \right. \\ &\quad \left. \left. + \frac{1}{\sigma_{\mathbf{w}}^2} \sum_{k=1}^K \left( \frac{\alpha R}{\sqrt{m_{ik}}} (1 + \sqrt{\frac{1}{2} \log(\frac{2}{\delta_i})}) + O_{\alpha, \beta}(\gamma, C) \right)^2 \right), \forall \mathcal{Q} \right\} \geq 1 - \delta_i, \end{aligned} \quad (31)$$

Using the notations in Section 3, the above bound can be simplified as

$$\begin{aligned} &\mathbb{P}_{S_i \sim D_i^{m_i}} \left\{ \mathbf{v} \sim \mathcal{N}(\mathbf{v}^Q, \sigma_{\mathbf{v}}^2 I_{d_{\mathbf{v}}}), \mathbf{w}^P = \Phi_{\mathbf{v}}(D), P_i = \mathcal{N}(\mathbf{w}^P, \sigma_{\mathbf{w}}^2 I_{d_{\mathbf{w}}}) \mid \text{er}(A_b(S_i, P_i)) \right. \\ &\leq \frac{c_2}{1 - e^{-c_2}} \mathbb{E}_{\mathbf{v} \sim \mathcal{N}(\mathbf{v}^Q, \sigma_{\mathbf{v}}^2 I_{d_{\mathbf{v}}}), \mathbf{w}^P = \Phi_{\mathbf{v}}(D), P_i = \mathcal{N}(\mathbf{w}^P, \sigma_{\mathbf{w}}^2 I_{d_{\mathbf{w}}})} \hat{\text{er}}(A_b(S_i, P_i)) \\ &\quad + \frac{1}{(1 - e^{-c_2}) m_i} \left( \frac{1}{2\sigma_{\mathbf{v}}^2} \|\mathbf{v}^Q\|^2 + \frac{1}{\sigma_{\mathbf{w}}^2} \|\mathbb{E}_{\mathbf{v}} \mathbf{w}_i^Q - \bar{\Phi}_{\mathbf{v}}(S_i)\|^2 + \log \frac{2}{\delta_i} + d_{\mathbf{w}} K \left( \frac{\sigma_{\mathbf{v}}}{\sigma_{\mathbf{w}}} \right)^2 \right. \\ &\quad \left. \left. + \frac{1}{\sigma_{\mathbf{w}}^2} \sum_{k=1}^K \left( \frac{\alpha R}{\sqrt{m_{ik}}} (1 + \sqrt{\frac{1}{2} \log(\frac{2}{\delta_i})}) + O_{\alpha, \beta}(\gamma, C) \right)^2 \right), \forall \mathcal{Q} \right\} \geq 1 - \delta_i. \end{aligned} \quad (32)$$

**Second step** Next we bound the error due to observing a limited number of tasks from the environment. We reuse Theorem 4 with the following substitutions. The samples are  $(D_i, m_i, S_i), i = 1, \dots, n$ ,



where  $(D_i, m_i)$  are sampled from the same meta distribution  $\tau$  and  $S_i \sim D_i^{m_i}$ . The hypothesis is parameterized as  $\Phi_{\mathbf{v}}(D)$  with meta learner parameter  $\mathbf{v}$ . The loss function is  $g(f, X) \triangleq \mathbb{E}_{(\mathbf{x}, y) \sim D} \mathbb{E}_{\mathbf{w}^Q \sim \mathcal{N}(\mathbf{w}^Q, \sigma_{\mathbf{w}}^2 I_{d_{\mathbf{w}}})} \ell(h_{\mathbf{w}}(\mathbf{x}), y)$ , where  $\mathbf{w}^Q = A_b(S_i, P_i)$ . Let  $\pi \triangleq \mathcal{N}(0, \sigma_{\mathbf{v}}^2 I_{d_{\mathbf{v}}})$  be the prior over meta learner parameter, the following holds for any  $\delta_0 > 0$ ,

$$\begin{aligned} & \mathbb{P}_{(D_i^{m_i}) \sim \tau, S_i \sim D_i^{m_i}, i=1, \dots, n} \left\{ \mathbb{E}_{(D, m) \sim \tau} \mathbb{E}_{S \sim D^m} \mathbb{E}_{\mathbf{v} \sim \mathcal{N}(\mathbf{v}^Q, \sigma_{\mathbf{v}}^2 I_{d_{\mathbf{v}}})} \mathbb{E}_{\mathbf{w} \sim \mathcal{N}(\mathbf{w}^Q, \sigma_{\mathbf{w}}^2 I_{d_{\mathbf{w}}})} \mathbb{E}_{(x, y) \sim D_i} \ell(h_{\mathbf{w}}(\mathbf{x}), y) \right. \\ & \leq \frac{c_1}{1 - e^{-c_1}} \cdot \frac{1}{n} \sum_{i=1}^n \mathbb{E}_{\mathbf{v} \sim \mathcal{N}(\mathbf{v}^Q, \sigma_{\mathbf{v}}^2 I_{d_{\mathbf{v}}})} \mathbb{E}_{\mathbf{w} \sim \mathcal{N}(\mathbf{w}^Q, \sigma_{\mathbf{w}}^2 I_{d_{\mathbf{w}}})} \mathbb{E}_{(x, y) \sim D_i} \ell(h_{\mathbf{w}}(\mathbf{x}), y) \\ & \quad \left. + \frac{1}{(1 - e^{-c_1})n} \left( \frac{1}{2\sigma_{\mathbf{v}}^2} \|\mathbf{v}^Q\|^2 + \log \frac{1}{\delta_0} \right), \forall \mathcal{Q} \right\} \geq 1 - \delta_0. \end{aligned} \quad (33)$$

Using the term in Section 3, the above bound can be simplified as

$$\begin{aligned} & \mathbb{P}_{(D_i^{m_i}) \sim \tau, S_i \sim D_i^{m_i}, i=1, \dots, n} \left\{ er(\mathcal{Q}) \right. \\ & \leq \frac{c_1}{1 - e^{-c_1}} \cdot \frac{1}{n} \sum_{i=1}^n \mathbb{E}_{\mathbf{v} \sim \mathcal{N}(\mathbf{v}^Q, \sigma_{\mathbf{v}}^2 I_{d_{\mathbf{v}}}), \mathbf{w}^P = \Phi_{\mathbf{v}}(D), P_i = \mathcal{N}(\mathbf{w}^P, \sigma_{\mathbf{w}}^2 I_{d_{\mathbf{w}}})} er(A_b(S_i, P_i)) \\ & \quad \left. + \frac{1}{(1 - e^{-c_1})n} \left( \frac{1}{2\sigma_{\mathbf{v}}^2} \|\mathbf{v}^Q\|^2 + \log \frac{1}{\delta_0} \right), \forall \mathcal{Q} \right\} \geq 1 - \delta_0, \end{aligned} \quad (34)$$

Finally, by employing the union bound, we could bound the probability of the intersection of the events in (32) and (34). For any  $\delta > 0$ , set  $\delta_0 \triangleq \frac{\delta}{2}$  and  $\delta_i \triangleq \frac{\delta}{2n}$  for  $i = 1, \dots, n$ , we have

$$\begin{aligned} & \mathbb{P}_{(D_i^{m_i}) \sim \tau, S_i \sim D_i^{m_i}, i=1, \dots, n} \left\{ er(\mathcal{Q}) \right. \\ & \leq \frac{c_1 c_2}{(1 - e^{-c_1})(1 - e^{-c_2})} \cdot \frac{1}{n} \sum_{i=1}^n \mathbb{E}_{\mathbf{v} \sim \mathcal{N}(\mathbf{v}^Q, \sigma_{\mathbf{v}}^2 I_{d_{\mathbf{v}}}), \mathbf{w}^P = \Phi_{\mathbf{v}}(D), P_i = \mathcal{N}(\mathbf{w}^P, \sigma_{\mathbf{w}}^2 I_{d_{\mathbf{w}}})} \hat{er}(A_b(S_i, P_i)) \\ & \quad + \frac{c_1}{1 - e^{-c_1}} \cdot \frac{1}{n} \sum_{i=1}^n \frac{1}{(1 - e^{-c_2})m_i} \left( \frac{1}{2\sigma_{\mathbf{v}}^2} \|\mathbf{v}^Q\|^2 + \frac{1}{\sigma_{\mathbf{w}}^2} \|\mathbb{E}_{\mathbf{v}} \mathbf{w}_i^Q - \bar{\Phi}_{\mathbf{v}^Q}(S_i)\|^2 + \log \frac{4n}{\delta} \right. \\ & \quad \left. + \frac{1}{\sigma_{\mathbf{w}}^2} \sum_{k=1}^K \left( \frac{\alpha R}{\sqrt{m_{ik}}} (1 + \sqrt{\frac{1}{2} \log(\frac{4n}{\delta})}) + O_{\alpha, \beta}(\gamma, C) \right)^2 + d_{\mathbf{w}} K \left( \frac{\sigma_{\mathbf{v}}}{\sigma_{\mathbf{w}}} \right)^2 \right) \\ & \quad \left. + \frac{1}{(1 - e^{-c_1})n} \left( \frac{1}{2\sigma_{\mathbf{v}}^2} \|\mathbf{v}^Q\|^2 + \log \frac{2}{\delta} \right), \forall \mathcal{Q} \right\} \geq 1 - \delta. \end{aligned} \quad (35)$$

We can further simplify the notation and obtain that

$$\begin{aligned} & \mathbb{P}_{(D_i^{m_i}) \sim \tau, S_i \sim D_i^{m_i}, i=1, \dots, n} \left\{ er(\mathcal{Q}) \leq c'_1 c'_2 \hat{er}(\mathcal{Q}) \right. \\ & \quad + \left( \sum_{i=1}^n \frac{c'_1 c'_2}{2c_2 n m_i \sigma_{\mathbf{v}}^2} + \frac{c'_1}{2c_1 n \sigma_{\mathbf{v}}^2} \right) \|\mathbf{v}^Q\|^2 + \sum_{i=1}^n \frac{c'_1 c'_2}{c_2 n m_i \sigma_{\mathbf{w}}^2} \|\mathbb{E}_{\mathbf{v}} \mathbf{w}_i^Q - \bar{\Phi}_{\mathbf{v}^Q}(S_i)\|^2 \\ & \quad \left. + \text{const}(\alpha, \beta, R, \delta, n, m_i), \forall \mathcal{Q} \right\} \geq 1 - \delta, \end{aligned} \quad (36)$$

457 where  $c'_1 = \frac{c_1}{1 - e^{-c_1}}$  and  $c'_2 = \frac{c_2}{1 - e^{-c_2}}$ . This completes the proof.

#### 458 D.4 PROOF OF THEOREM 1

**Theorem 2** Let  $Q$  be the posterior of base learner  $Q = \mathcal{N}(\mathbf{w}^Q, \sigma_{\mathbf{w}}^2 I_{d_{\mathbf{w}}})$  and  $P$  be the prior  $\mathcal{N}(\mathbf{w}^P, \sigma_{\mathbf{w}}^2 I_{d_{\mathbf{w}}})$ . The mean of prior is sampled from the hyperposterior of meta learner  $\mathcal{Q} = \mathcal{N}(\mathbf{w}^Q, \sigma_{\mathbf{w}}^2 I_{d_{\mathbf{w}}})$ . Given the hyperprior  $\mathcal{P} = \mathcal{N}(0, \sigma_{\mathbf{w}}^2 I_{d_{\mathbf{w}}})$ , then for any hyperposterior  $\mathcal{Q}$ , any

$c_1, c_2 > 0$  and any  $\delta \in (0, 1]$  with probability  $\geq 1 - \delta$  we have,

$$\begin{aligned} er(\mathcal{Q}) \leq & c'_1 c'_2 \hat{er}(\mathcal{Q}) + \left( \sum_{i=1}^n \frac{c'_1 c'_2}{2c_2 n m_i \sigma_{\mathbf{w}}^2} + \frac{c'_1}{2c_1 n \sigma_{\mathbf{w}}^2} \right) \|\mathbf{w}^{\mathcal{Q}}\|^2 + \sum_{i=1}^n \frac{c'_1 c'_2}{2c_2 n m_i \sigma_{\mathbf{w}}^2} \|\mathbb{E}_{\mathbf{w}^P} \mathbf{w}_i^{\mathcal{Q}} - \mathbf{w}^{\mathcal{Q}}\|^2 \\ & + \sum_{i=1}^n \frac{c'_1 c'_2}{c_2 n m_i \sigma_{\mathbf{w}}^2} \left( \frac{1}{2} + \log \frac{2n}{\delta} \right) + \frac{c'_1}{c_1 n \sigma_{\mathbf{w}}^2} \log \frac{2}{\delta}, \end{aligned} \quad (37)$$

459 where  $c'_1 = \frac{c_1}{1-e^{-c_1}}$  and  $c'_2 = \frac{c_2}{1-e^{-c_2}}$ .

**Proof** Instead of generating the mean of prior with a prior predictor, the vanilla meta-learning framework directly produces the mean of prior  $\mathbf{w}^P$  by sampling from hyperposterior  $\mathcal{Q} = \mathcal{N}(\mathbf{w}^{\mathcal{Q}}, \sigma_{\mathbf{w}}^2 I_{d_{\mathbf{w}}})$ . Then the base learner algorithm  $A_b(S, P)$  utilizes the sample set  $S$  and the prior  $P = \mathcal{N}(\mathbf{w}^P, \sigma_{\mathbf{w}}^2 I_{d_{\mathbf{w}}})$  to produce a posterior  $Q = A_b(S, P) = \mathcal{N}(\mathbf{w}^Q, \sigma_{\mathbf{w}}^2 I_{d_{\mathbf{w}}})$ . Similarly with the two-steps proof in Theorem 2, we first get an intra-task bound by using Theorem 4. For any  $\delta_i > 0$ , we have

$$\begin{aligned} & \mathbb{P}_{S_i \sim D_i^{m_i}} \left\{ \mathbb{E}_{(\mathbf{x}, y) \sim D_i} \mathbb{E}_{\mathbf{w}^P \sim \mathcal{N}(\mathbf{w}^{\mathcal{Q}}, \sigma_{\mathbf{w}}^2 I_{d_{\mathbf{w}}})} \mathbb{E}_{\mathbf{w} \sim \mathcal{N}(\mathbf{w}^Q, \sigma_{\mathbf{w}}^2 I_{d_{\mathbf{w}}})} \ell(h_{\mathbf{w}}(\mathbf{x}), y) \right. \\ & \leq \frac{c_2}{1-e^{-c_2}} \cdot \frac{1}{m_i} \sum_{j=1}^{m_i} \mathbb{E}_{\mathbf{w}^P \sim \mathcal{N}(\mathbf{w}^{\mathcal{Q}}, \sigma_{\mathbf{w}}^2 I_{d_{\mathbf{w}}})} \mathbb{E}_{\mathbf{w} \sim \mathcal{N}(\mathbf{w}^Q, \sigma_{\mathbf{w}}^2 I_{d_{\mathbf{w}}})} \ell(h_{\mathbf{w}}(\mathbf{x}_j), y_j) \\ & \left. + \frac{1}{(1-e^{-c_2}) \cdot m_i} \left( \frac{1}{2\sigma_{\mathbf{w}}^2} \|\mathbf{w}^{\mathcal{Q}}\|^2 + \mathbb{E}_{\mathbf{w}_i^P \sim \mathcal{N}(\mathbf{w}^{\mathcal{Q}}, \sigma_{\mathbf{w}}^2 I_{d_{\mathbf{w}}})} \frac{1}{2\sigma_{\mathbf{w}}^2} \|\mathbf{w}_i^{\mathcal{Q}} - \mathbf{w}_i^P\|^2 + \log \frac{1}{\delta_i} \right), \forall \mathcal{Q} \right\} \geq 1 - \delta_i, \end{aligned} \quad (38)$$

The term  $\mathbb{E}_{\mathbf{w}_i^P \sim \mathcal{N}(\mathbf{w}^{\mathcal{Q}}, \sigma_{\mathbf{w}}^2 I_{d_{\mathbf{w}}})} \frac{1}{2\sigma_{\mathbf{w}}^2} \|\mathbf{w}_i^{\mathcal{Q}} - \mathbf{w}_i^P\|^2$  can be simplified as

$$\begin{aligned} & \mathbb{E}_{\mathbf{w}_i^P \sim \mathcal{N}(\mathbf{w}^{\mathcal{Q}}, \sigma_{\mathbf{w}}^2 I_{d_{\mathbf{w}}})} \frac{1}{2\sigma_{\mathbf{w}}^2} \|\mathbf{w}_i^{\mathcal{Q}} - \mathbf{w}_i^P\|^2 \\ & = \frac{1}{2\sigma_{\mathbf{w}}^2} \left( \mathbb{E}_{\mathbf{w}_i^P} \|\mathbf{w}_i^{\mathcal{Q}}\|^2 - 2(\mathbb{E}_{\mathbf{w}_i^P} \mathbf{w}_i^{\mathcal{Q}})^{\top} \mathbf{w}^{\mathcal{Q}} + \|\mathbf{w}^{\mathcal{Q}}\|^2 + \mathbb{V}_{\mathbf{w}_i^P}[\|\mathbf{w}_i^{\mathcal{Q}}\|] \right) \\ & = \frac{1}{2\sigma_{\mathbf{w}}^2} \left( \|\mathbb{E}_{\mathbf{w}_i^P} \mathbf{w}_i^{\mathcal{Q}} - \mathbf{w}^{\mathcal{Q}}\|^2 + \sigma_{\mathbf{w}}^2 \right), \end{aligned} \quad (39)$$

where  $\mathbb{V}_{\mathbf{w}_i^P}[\|\mathbf{w}_i^{\mathcal{Q}}\|]$  denotes the variance of  $\|\mathbf{w}_i^{\mathcal{Q}}\|$ . Then we get an inter-task bound. For any  $\delta_0 > 0$ , we have

$$\begin{aligned} & \mathbb{P}_{(D_i^{m_i}) \sim \tau, S_i \sim D_i^{m_i}, i=1, \dots, n} \left\{ \mathbb{E}_{(D, m) \sim \tau} \mathbb{E}_{S \sim D^m} \mathbb{E}_{\mathbf{w}^P \sim \mathcal{N}(\mathbf{w}^{\mathcal{Q}}, \sigma_{\mathbf{w}}^2 I_{d_{\mathbf{w}}})} \mathbb{E}_{\mathbf{w} \sim \mathcal{N}(\mathbf{w}^Q, \sigma_{\mathbf{w}}^2 I_{d_{\mathbf{w}}})} \mathbb{E}_{(x, y) \sim D_i} \ell(h_{\mathbf{w}}(\mathbf{x}), y) \right. \\ & \leq \frac{c_1}{1-e^{-c_1}} \cdot \frac{1}{n} \sum_{i=1}^n \mathbb{E}_{\mathbf{w}^P \sim \mathcal{N}(\mathbf{w}^{\mathcal{Q}}, \sigma_{\mathbf{w}}^2 I_{d_{\mathbf{w}}})} \mathbb{E}_{\mathbf{w} \sim \mathcal{N}(\mathbf{w}^Q, \sigma_{\mathbf{w}}^2 I_{d_{\mathbf{w}}})} \mathbb{E}_{(x, y) \sim D_i} \ell(h_{\mathbf{w}}(\mathbf{x}), y) \\ & \left. + \frac{1}{(1-e^{-c_1})n} \left( \frac{1}{2\sigma_{\mathbf{w}}^2} \|\mathbf{w}^{\mathcal{Q}}\|^2 + \log \frac{1}{\delta_0} \right), \forall \mathcal{Q} \right\} \geq 1 - \delta_0. \end{aligned} \quad (40)$$

For any  $\delta > 0$ , set  $\delta_0 \triangleq \frac{\delta}{2}$  and  $\delta_i \triangleq \frac{\delta}{2n}$  for  $i = 1, \dots, n$ . Using the union bound, we finally get

$$\begin{aligned} & \mathbb{P}_{(D_i^{m_i}) \sim \tau, S_i \sim D_i^{m_i}, i=1, \dots, n} \left\{ er(\mathcal{Q}) \right. \\ & \leq \frac{c_1 c_2}{(1-e^{-c_1})(1-e^{-c_2})} \cdot \frac{1}{n} \sum_{i=1}^n \mathbb{E}_{\mathbf{v} \sim \mathcal{N}(\mathbf{v}^{\mathcal{Q}}, \sigma_{\mathbf{v}}^2 I_{d_{\mathbf{v}}}), \mathbf{w}^P = \Phi_{\mathbf{v}}(D), P_i = \mathcal{N}(\mathbf{w}^P, \sigma_{\mathbf{w}}^2 I_{d_{\mathbf{w}}})} \hat{er}(A_b(S_i, P_i)) \\ & + \frac{c_1}{1-e^{-c_1}} \cdot \frac{1}{n} \sum_{i=1}^n \frac{1}{(1-e^{-c_2}) \cdot m_i} \left( \frac{1}{2\sigma_{\mathbf{w}}^2} \|\mathbf{w}^{\mathcal{Q}}\|^2 + \frac{1}{2\sigma_{\mathbf{w}}^2} \|\mathbb{E}_{\mathbf{w}_i^P} \mathbf{w}_i^{\mathcal{Q}} - \mathbf{w}^{\mathcal{Q}}\|^2 + \frac{1}{2} + \log \frac{2n}{\delta} \right) \\ & \left. + \frac{1}{(1-e^{-c_1})n} \left( \frac{1}{2\sigma_{\mathbf{w}}^2} \|\mathbf{w}^{\mathcal{Q}}\|^2 + \log \frac{2}{\delta} \right), \forall \mathcal{Q} \right\} \geq 1 - \delta. \end{aligned} \quad (41)$$

Similarly, we can further simplify the notation and obtain that

$$\begin{aligned} & \mathbb{P}_{(D_i^{m_i}) \sim \tau, S_i \sim D_i^{m_i}, i=1, \dots, n} \left\{ er(\mathcal{Q}) \leq c'_1 c'_2 \hat{er}(\mathcal{Q}) \right. \\ & \quad + \left( \sum_{i=1}^n \frac{c'_1 c'_2}{2c_2 n m_i \sigma_{\mathbf{w}}^2} + \frac{c'_1}{2c_1 n \sigma_{\mathbf{w}}^2} \right) \|\mathbf{w}^{\mathcal{Q}}\|^2 + \sum_{i=1}^n \frac{c'_1 c'_2}{2c_2 n m_i \sigma_{\mathbf{w}}^2} \left\| \mathbb{E}_{\mathbf{w}^P} \mathbf{w}_i^{\mathcal{Q}} - \mathbf{w}^{\mathcal{Q}} \right\|^2 \\ & \quad \left. + \text{const}(\delta, n, m_i), \forall \mathcal{Q} \right\} \geq 1 - \delta, \end{aligned} \quad (42)$$

where  $c'_1 = \frac{c_1}{1-e^{-c_1}}$  and  $c'_2 = \frac{c_2}{1-e^{-c_2}}$ . This completes the proof.

## E DETAILS OF EXPERIMENTS

While the theorems consider bounded-loss, we use an unbounded loss in our experiments, we can have theoretical guarantees on a variation of the loss which is clipped to  $[0, 1]$ . Besides, in practice the loss function is almost always smaller than one.

### E.1 DATA PREPARATION

We used the 5-way 50-shot classification setups, where each task instance involves classifying images from 5 different categories sampled randomly from one of the meta-sets. We did not employ any data augmentation or feature averaging during meta-training, or any other data apart from the corresponding training and validation meta-sets.

### E.2 NETWORK ARCHITECTURE

**Auto-Encoder for LCC** For CIFAR100, the encoder is 7 layers with 16-32-64-64-128-128-256 channels. Each convolutional layer is followed by a LeakyReLU activation and a batch normalization layer. The 1st, 3rd and 5th layer have stride 1 and kernel size (3, 3). The 2nd, 4th and 6th layer have stride 2 and kernel size (4, 4). The 7th layer has stride 1 and kernel size (4, 4). The decoder is the same as encoder except that the layers are in reverse order. The input is resized to  $32 \times 32$ . For Caltech-256, the encoder is 5 layers with 32-64-128-256-256 channels. Each convolutional layer is followed by a LeakyReLU activation and a batch normalization layer. The first 4 layers have stride 2 and kernel size (4, 4). The last layer has stride 1 and kernel size (6, 6). The decoder is the same as encoder except that the layers are in reverse order. The input is resized to  $96 \times 96$ .

**Base Model** The network architecture used for the classification task is a small CNN with 4 convolutional layers, each with 32 filters, and a linear output layer, similar to Finn et al. (2017). Each convolutional layer is followed by a Batch Normalization layer, a Leaky ReLU layer, and a max-pooling layer. For CIFAR100, the input is resized to  $32 \times 32$ . For Caltech-256, the input is resized to  $96 \times 96$ .

### E.3 OPTIMIZATION

**Auto-Encoder for LCC** As optimizer we used AdamKingma & Ba (2015) with  $\beta_1 = 0.9$  and  $\beta_2 = 0.999$ . The initial learning rate is  $1 \times 10^{-4}$ . The number of epochs is 100. The batch size is 512.

**LCC Training** We alternatively train the coefficients and bases of LCC with Adam with  $\beta_1 = 0.9$  and  $\beta_2 = 0.999$ . In specifics, for both datasets, we alternatively update the coefficients for 60 times and then update the bases for 60 times. The number of training epochs is 3. The number of bases is 64. The batch size is 256.

**Pre-Training of Feature Extractor** We use a 64-way classification in CIFAR-100 and 150-way classification in Caltech-256 to pre-train the feature embedding only on the meta-training dataset. For both CIFAR100 and Caltech-256, an L2 regularization term of  $5e^{-4}$  was used. We used the Adam optimizer. The initial learning rate is  $1 \times 10^{-3}$ ,  $\beta_1$  is 0.9 and  $\beta_2$  is 0.999. The number of epochs is 50. The batch size is 512.

**Meta-Training** We use the cross-entropy loss as in Amit & Meir (2018). Although this is inconsistent with the bounded loss setting in our theoretical framework, we can still have a guarantee on a variation of the loss which is clipped to  $[0, 1]$ . In practice, the loss is almost always smaller than one. For CIFAR100 and Caltech-256, the number of epochs of meta-training phase is 12; the number of epochs of meta-testing phase is 40. The batch size is 32 for both datasets. As optimizer we used Adam with  $\beta_1 = 0.9$  and  $\beta_2 = 0.999$ . In the setting with a pre-trained base model, the learning rate is  $1 \times 10^{-5}$  for convolutional layers and  $5 \times 10^{-4}$  for the linear output layer. In the setting without a pre-trained base model, the learning rate is  $1 \times 10^{-3}$  for convolutional layers and  $5 \times 10^{-3}$  for the linear output layer. The confidence parameter is chosen to be  $\delta = 0.1$ . The variance hyper-parameters for prior predictor and base model are  $\sigma_w = \sigma_v = 0.01$ . The hyperparameters  $\alpha_1, \alpha_2$  in LML and ML-A are set to 0.01.

#### E.4 MORE EXPERIMENTAL RESULTS

We also compare with two typical meta-learning few-shot learning methods: MAML (Finn et al., 2017) and MatchingNet (Vinyals et al., 2016). Both two methods use the Adam optimizer with initial learning rate 0.0001. In the meta-training phase, we randomly split the samples of each class into support set (5 samples) and query set (45 samples). The number of epochs is 100. For MAML, the learning rate of inner update is 0.01.

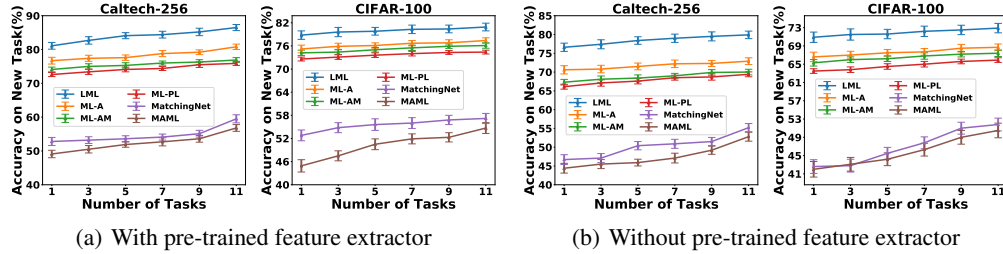

Figure 5: Average test accuracy of learning a new task for varied numbers of training tasks ( $|C| = 64$ ).

In Figure 5, we demonstrate the average test error of learning a new task based on the number of training tasks, together with the standard deviation, in different settings (with or without a pre-trained feature extractor). We can find that all PAC-Bayes baselines outperform MAML and MatchingNet. Note that MAML and MatchingNet adopt the episodic training paradigm to solve the few-shot learning problem. The meta-training process requires millions of tasks and each task contains limited samples, which is not the case in our experiments. Scarce tasks in meta-training leads to severely meta-overfitting. In our method, the learned prior serves both as an initialization of base model and as a regularizer which restricts the solution space in a soft manner while allowing variation based on specific task data. It yields a model with smaller error than its unbiased counterpart when applied to a similar task.

#### F PSEUDO CODE

---

**Algorithm 1** Localized Meta-Learning (LML) algorithm

---

**Input:** Data sets of observed tasks:  $S_1, \dots, S_n$ .**Output:** Learned prior predictor  $\Phi$  parameterized by  $\mathbf{v}$ .Initialize  $\mathbf{v} \in \mathbb{R}^{d_v}$  and  $\mathbf{w}_i \in \mathbb{R}^{d_w}$  for  $i = 1 \dots, n$ .Construct LCC scheme  $(\gamma, C)$  from the whole training data by optimizing Eq. (12).**while** not converged **do**  **for** each task  $i \in \{1, \dots, n\}$  **do**    Sample a random mini-batch from the data  $S'_i \subset S_i$ .    Approximate  $\mathbb{E}_{\mathbf{v}} \hat{r}_i(\mathbf{w}_i)$  using  $S'_i$ .  **end for**  Compute the objective in (11), i.e.  $J \leftarrow \sum_{i=1}^n \mathbb{E}_{\mathbf{v}} \hat{r}_i(\mathbf{w}_i) + \alpha_1 \|\mathbf{v}^Q\|^2 + \sum_{i=1}^n \frac{\alpha_2}{m_i} \|\mathbb{E}_{\mathbf{v}} \mathbf{w}_i^Q - \bar{\Phi}_{\mathbf{v}^Q}(S_i)\|^2$ .  Evaluate the gradient of  $J$  w.r.t.  $\{\mathbf{v}, \mathbf{w}_1, \dots, \mathbf{w}_n\}$  using backpropagation.

Take an optimization step.

**end while**

---
